# Supplementary material for: Association between hand grip strength and impaired health-related quality of life in Korean cancer survivors: a cross-sectional study
Source: PubMed Central journal article supplement — BMJ Open. 2019 Sep 8;9(9):e030938. doi: 10.1136/bmjopen-2019-030938 (PMC6738715; doi:10.1136/bmjopen-2019-030938), 2019-09-08
Supplement: bmjopen-2019-030938.draft_revisions.pdf [file bmjopen-2019-030938.draft_revisions.pdf]

# BMJ Open

BMJ Open is committed to open peer review. As part of this commitment we make the peer review history of every article we publish publicly available.

When an article is published we post the peer reviewers' comments and the authors' responses online. We also post the versions of the paper that were used during peer review. These are the versions that the peer review comments apply to.

The versions of the paper that follow are the versions that were submitted during the peer review process. They are not the versions of record or the final published versions. They should not be cited or distributed as the published version of this manuscript.

BMJ Open is an open access journal and the full, final, typeset and author-corrected version of record of the manuscript is available on our site with no access controls, subscription charges or pay-per-view fees (<http://bmjopen.bmj.com>).

If you have any questions on BMJ Open's open peer review process please email [info.bmjopen@bmj.com](mailto:info.bmjopen@bmj.com)

# BMJ Open

## Association between hand grip strength and health-related quality of life among in Korean cancer survivors: a cross-sectional study

|                               |                                                                                                                                                                                       |
|-------------------------------|---------------------------------------------------------------------------------------------------------------------------------------------------------------------------------------|
| Journal:                      | <i>BMJ Open</i>                                                                                                                                                                       |
| Manuscript ID                 | bmjopen-2019-030938                                                                                                                                                                   |
| Article Type:                 | Research                                                                                                                                                                              |
| Date Submitted by the Author: | 08-Apr-2019                                                                                                                                                                           |
| Complete List of Authors:     | paek, jeongki; Inje University Sanggye Paik Hospital, Department of Family Medicine;<br>Choi, Yoon Ji; Korea University College of Medicine and School of Medicine, Internal Medicine |
| Keywords:                     | Korea National Health and Nutrition Examination Survey, neoplasms, cancer survivors, hand strength, quality of life                                                                   |
|                               |                                                                                                                                                                                       |

SCHOLARONE™  
Manuscripts

1  
2  
3  
4  
5  
6 **Association between hand grip strength and health-related quality of life among in**  
7  
8 **Korean cancer survivors: a cross-sectional study**  
9

10  
11  
12  
13  
14  
15 Jeong Ki Paek MD<sup>1</sup>, Yoon Ji Choi MD, PhD<sup>2</sup>  
16

17  
18  
19  
20  
21 <sup>1</sup>Department of Family Medicine, SanggyePaik Hospital, Seoul, Korea  
22

23  
24 <sup>2</sup>Division of Hematology/Oncology, Department of Internal Medicine, Korea University  
25  
26 College of Medicine, Seoul, Korea  
27  
28  
29  
30  
31

32 **Authors' email addresses and contributions:**  
33

34 YJC: [yj\\_choi@korea.ac.kr](mailto:yj_choi@korea.ac.kr)  
35

36 ORCID: <http://orcid.org/0000-0002-1831-0555>  
37  
38  
39  
40  
41  
42

43 JKP: [jk.paek@paik.ac.kr](mailto:jk.paek@paik.ac.kr)  
44

45 ORCID: <http://orcid.org/0000-0002-5837-0106>  
46  
47  
48  
49  
50  
51

52 Corresponding Author: Dr. Yoon Ji Choi, Department of Internal Medicine, Korea University  
53

54 College of Medicine, Seoul, Korea Tel: +82-2-920-6267, Fax: +82-2-920-6267, Email:  
55

56  
57 [yj\\_choi@korea.ac.kr](mailto:yj_choi@korea.ac.kr)  
58  
59  
60

1  
2  
3  
4  
5  
6 **Word counts:** 2592 words (text only); **Abstract:** 254 words  
7  
8

9 Number of figures and tables: 3 figures and 2 tables  
10  
11  
12  
13  
14  
15  
16  
17  
18  
19  
20  
21  
22  
23  
24  
25  
26  
27  
28  
29  
30  
31  
32  
33  
34  
35  
36  
37  
38  
39  
40  
41  
42  
43  
44  
45  
46  
47  
48  
49  
50  
51  
52  
53  
54  
55  
56  
57  
58  
59  
60

For peer review only

## ABSTRACT

**Objectives:** To assess the association between hand grip strength (HGS) and health-related quality of life among Korean cancer survivors

**Design:** Population-based cross-sectional study

**Setting:** South Korea (Korea National Health and Nutrition Examination Surveys VI-VII)

**Participants:** Cancer survivors with available data on HGS and health-related quality of life (HRQoL) in the sixth and seventh Korea National Health and Nutrition Examination Surveys (2014-2017)

**Primary outcome measures:** Prevalence of impaired HRQoL by HGS (normal and weak)

**Secondary outcome measures:** Estimated risk of impaired quality of life by HGS by calculating odds ratios (ORs) and adjusting for covariates in a multinomial logistic regression analysis.

**Results:** Among 1,037 cancer survivors (60.7% women, mean age = 62.2 years), 19.2% of them had weak HGS according to gender-specific cut-off values (lowest quintile; <29.7 kg in men and <19.7 kg in women). The prevalent cancer site was the stomach, followed by the thyroid, breast, colorectum, and cervix. Individuals with weak HGS showed statistically significantly increased impairment in all five dimensions of the EQ-5D compared with those in patients with normal HGS. In a multinomial logistic regression analysis, the risk of impaired HRQoL was significantly reduced in all dimensions of the EuroQol-5 dimension (EQ-5D), except for anxiety/depression, when HGS was increased. The OR for impaired HRQoL ranged from 0.86 to 0.97 per 1 kg increase in HGS in four dimensions (mobility, self-care, usual activity, and pain/discomfort).

**Conclusions:** Weak HGS was associated with impaired HRQoL in cancer survivors. Future longitudinal studies are needed to confirm the causality between HGS and HRQoL in cancer

1  
2  
3 survivors.  
4  
5  
6  
7

8 **Keywords:** Korea National Health and Nutrition Examination Survey, neoplasms, cancer  
9  
10 survivors, hand strength, quality of life  
11  
12  
13  
14  
15  
16  
17  
18  
19  
20  
21  
22  
23  
24  
25  
26  
27  
28  
29  
30  
31  
32  
33  
34  
35  
36  
37  
38  
39  
40  
41  
42  
43  
44  
45  
46  
47  
48  
49  
50  
51  
52  
53  
54  
55  
56  
57  
58  
59  
60

For peer review only

## STRENGTHS AND LIMITATIONS OF THIS STUDY

1. To our knowledge, this is the first study to evaluate the correlation between hand grip strength (HGS) and health-related quality of life (HRQoL) in cancer survivors.
2. This large, population-based study used nationally representative data from the Korea National Health and Nutrition Examination Survey (KNHANES).
3. Multiple logistic regression analyses were used to examine the associations between HGS and impaired HRQoL status after adjusting for various health behavioral factors.
4. The cross-sectional design of this study limits the ability to establish causal-interference relationships between HGS and HRQOL.
5. Because our data were confined to the Korean population, the results cannot be generalized to other ethnic populations.

## INTRODUCTION

Cancer is a fatal and serious disease. However, with improving diagnostic and therapeutic techniques, the survival rate of cancer patients is increasing worldwide.<sup>1</sup> According to the Korea National Cancer Incidence Database, overall cancer mortality has decreased 2.7% annually since 2002, although the all-cancer incidence rate increased by 3.6% annually from 1999 to 2011, resulting in a long-term survival probability of 70.5% in the 2010s compared with the that in 1990s.<sup>2</sup>

Compared with individuals in the general population, cancer survivors have increased risks of chronic diseases such as cardiovascular disease, second primary malignancy, and osteoporosis.<sup>3-5</sup> Furthermore, deterioration of physical function and psychosocial problems is common.<sup>6</sup>

As these survival issues and the life expectancy of cancer survivors have increased, health-related quality of life (HRQoL) has become an important outcome measure for survivors. HRQoL is a subjective, multidimensional concept that encompasses physical, social, functional, psychological/emotional health factors related to an individual's health. Several studies have reported that the HRQoL of cancer survivors is significantly lower than that of the non-cancer population.<sup>7-9</sup> The poor quality of life of cancer survivors is probably due to cancer itself and/or side effects of cancer treatments. Thus, there is a need to better monitor the quality of life in cancer survivors.

Hand grip strength (HGS) is a simple, fast, and reliable method for evaluating maximum voluntary squeezing force.<sup>10 11</sup> The measurement of HGS is useful not only to evaluate the qualitative and functional aspects of muscle strength in clinical practice but also to predict nutritional and general health statuses.<sup>12 13</sup> Additionally, HGS is associated with multiple chronic diseases and multimorbidity after adjusting for confounding factors.<sup>14</sup> Recent data showed that HGS could be an independent predictor of the quality of life in various disease



1  
2  
3 settings ranging from arthritis to chronic liver disease and depression.<sup>15-17</sup> In contrast, data on  
4 the impact of HGS on HRQoL in cancer survivors are lacking.  
5  
6

7 Given the above, we evaluated for the first time the cross-sectional associations of HGS with  
8 HRQoL among cancer survivors, using nationally representative data from the Korea National  
9 Health and Nutrition Examination Survey (KNHANES).  
10  
11  
12  
13  
14  
15  
16

## 17 **MATERIALS AND METHODS**

### 18 **Study population**

19  
20 The KNHANES is a cross-sectional, nationally representative survey that has been conducted  
21 to assess the health and nutritional status of the general population of Korea since 1998. The  
22 KNHANES uses a stratified multistage probability sampling to accurately represent the general  
23 population of South Korea. The present study analyzed data from the KNHANES VI-2,3 (2014-  
24 2015) and VII-1,2 (2016-2017). As shown in Figure 1, a total of 1,037 participants who met the  
25 eligibility criteria were enrolled in this study.  
26  
27  
28  
29  
30  
31  
32  
33  
34  
35  
36  
37

### 38 **Personal characteristics and clinical data**

39 The demographic characteristics included age, sex, height, weight, body mass index (BMI),  
40 education (<10 years or ≥10 years), household income (low or high), residence (rural or urban),  
41 and marital status (living with someone or living alone). Health behaviors, including smoking  
42 status (never, former, or current), high-risk drinking, and physical activity, were also assessed.  
43 High-risk drinking was defined as the consumption of more than seven (men) or five (women)  
44 drinks on a single occasion at least twice a week. Adequate physical activity was defined as at  
45 least 30 minutes of moderate-intensity activity five days a week or at least 20 minutes of  
46 vigorous physical activity three days per week. The comorbidities included hypertension,  
47 diabetes mellitus, ischemic heart disease, stroke, and depression. We collected data on cancer  
48  
49  
50  
51  
52  
53  
54  
55  
56  
57  
58  
59  
60

1  
2  
3 sites without data on current treatment and cancer-related symptoms.  
4  
5  
6

### 7 8 **Measurement of HGS** 9

10 HGS was measured to the nearest 0.1 kg using a digital hand dynamometer (Digital Grip  
11 Strength Dynamometer, T.K.K 5401, Takei Scientific Instruments Co., Ltd., Tokyo, Japan).  
12  
13 During the assessment, the participants were required to stand upright with their feet hip-width  
14 apart and to stretch their elbows completely. The participants were asked to apply the maximum  
15 grip strength three times for their left and right hands individually. The participants were  
16 instructed to hold the grip continuously with full force for more than 3 seconds. At least 30  
17 seconds of rest was allowed between each measurement. Grip strength was defined as the  
18 maximally measured value among the six measurements in both hands. Weak HGS was defined  
19 as the lowest quintile in both men and women.  
20  
21  
22  
23  
24  
25  
26  
27  
28  
29  
30  
31  
32

### 33 **Assessment of HRQoL** 34

35 We assessed HRQoL using the EuroQoL-5 Dimension (EQ-5D), which is a standardized  
36 instrument used to measure generic health status. It has been applied to a wide range of health  
37 conditions and treatments. The EQ-5D descriptive system comprises five dimensions: mobility,  
38 self-care, usual activities, pain/discomfort, and anxiety/depression. The participants had three  
39 possible responses depending on the severity for each dimension: “no problems,” “moderate  
40 problems,” and “severe problems.” The EQ-5D instrument has been translated into Korean.  
41  
42  
43  
44  
45  
46  
47  
48  
49  
50

### 51 **Statistical analyses** 52

53 We divided the participants into two groups based on HGS (normal or weak).  
54  
55 The baseline characteristics are reported as means and standard deviation for all continuous  
56 variables and as frequencies and percentage for categorical variables. The differences in several  
57  
58  
59  
60

1  
2  
3 covariates between the normal and weak HGS groups were assessed using Student's t-test for  
4 continuous variables and chi-square tests for categorical variables. Multiple logistic regression  
5 analyses were used to examine the associations between HGS and impaired HRQoL. All  
6 statistical analyses were performed using IBM SPSS Statistics for Windows, version 21.0 (IBM  
7 Corp., Armonk, NY, USA). A two-tailed P-value <0.05 was considered statistically significant.  
8  
9  
10  
11  
12  
13  
14  
15  
16

### 17 **Ethics statement**

18  
19 This study's protocol for performing an analysis of the 2014–2017 KNHANES data was  
20 reviewed and approved by the Institutional Review Board of the Korea Centers for Disease  
21 Control and Prevention. Informed consent was obtained from all participants when the 2014–  
22 2017 KNHANES were conducted.  
23  
24  
25  
26  
27  
28  
29

### 30 **RESULTS**

31  
32 Among 1,037 cancer survivors (60.7% women, mean age=62.2 years), the prevalent cancer site  
33 was the stomach, followed by the thyroid, breast, colorectum, and cervix. Overall, cancer  
34 survivors most commonly reported problems in pain/discomfort domain, followed by mobility  
35 and anxiety/depression. The sex-specific HGS cut-off values (lowest quintile) were 29.7 kg in  
36 men and 19.7 kg in women. The weak HGS group comprised 199 participants (19.2%) (18.6%  
37 of men and 19.6% of women). Table 1 shows the characteristics of the normal and weak HGS  
38 groups. There were significant differences in several anthropometric measurements (height,  
39 weight), socio-demographic characteristics (education, household income, residential area,  
40 marital status, physical activity), and comorbidities (hypertension, diabetes, stroke).  
41  
42 Participants with weak HGS showed significantly more impaired status for all dimensions of  
43 the EQ-5D compared with those in participants with normal HGS.  
44  
45  
46  
47  
48  
49  
50  
51  
52  
53  
54  
55  
56  
57  
58  
59  
60

**Table 1.** Characteristics of 1,037 cancer survivors according to hand-grip strength

|                                                  | Total<br>(N=1,037) | Normal<br>HGS<br>(n=822) | Weak HGS*<br>(n=199) | P-value |
|--------------------------------------------------|--------------------|--------------------------|----------------------|---------|
| Age (y)                                          | 62.2±12.4          | 60.3±12.1                | 70.1±10.3            | <0.001  |
| Sex                                              |                    |                          |                      | 0.711   |
| Men                                              | 408 (39.3)         | 332 (39.6)               | 76 (38.2)            |         |
| Women                                            | 629 (60.7)         | 506 (60.4)               | 123 (61.8)           |         |
| Height (cm)                                      | 160.4±8.2          | 161.3±7.8                | 156.3±8.6            | <0.001  |
| Weight (kg)                                      | 60.7±10.1          | 61.6±10.0                | 56.7±9.3             | <0.001  |
| BMI (kg/m <sup>2</sup> )                         | 23.6±3.2           | 23.6±3.3                 | 23.2±3.2             | 0.071   |
| Hand grip strength (kg)                          |                    |                          |                      |         |
| Men                                              | 36.3±7.7           | 38.7±6.2                 | 25.9±3.7             | <0.001  |
| Women                                            | 23.7±4.8           | 25.3±3.6                 | 16.8±2.6             | <0.001  |
| Education                                        |                    |                          |                      | <0.001  |
| <10 years                                        | 498 (48.0)         | 365 (43.8)               | 133 (66.8)           |         |
| ≥10 years                                        | 535 (51.6)         | 469 (56.2)               | 66 (33.2)            |         |
| Income                                           |                    |                          |                      | <0.001  |
| 1 <sup>st</sup> , 2 <sup>nd</sup> quartile (low) | 565 (54.5)         | 419 (50.0)               | 146 (73.4)           |         |

1  
2  
3  
4  
5  
6  
7  
8  
9  
10  
11  
12  
13  
14  
15  
16  
17  
18  
19  
20  
21  
22  
23  
24  
25  
26  
27  
28  
29  
30  
31  
32  
33  
34  
35  
36  
37  
38  
39  
40  
41  
42  
43  
44  
45  
46  
47  
48  
49  
50  
51  
52  
53  
54  
55  
56  
57  
58  
59  
60

|                                                   |            |            |            |        |
|---------------------------------------------------|------------|------------|------------|--------|
| 3 <sup>rd</sup> , 4 <sup>th</sup> quartile (high) | 471 (45.4) | 419 (50.0) | 52 (26.1)  |        |
| Residence                                         |            |            |            | 0.005  |
| Urban                                             | 722 (69.6) | 600 (71.6) | 122 (61.3) |        |
| Rural                                             | 315 (30.4) | 238 (28.4) | 77 (38.7)  |        |
| Marital status                                    |            |            |            | <0.001 |
| Live alone                                        | 148 (14.3) | 98 (11.7)  | 50 (25.1)  |        |
| Live with someone                                 | 889 (85.7) | 740 (88.3) | 149 (74.9) |        |
| Former/current smoking                            | 374 (36.1) | 308 (37.2) | 66 (33.5)  | 0.339  |
| Problem drinking†                                 | 371 (35.8) | 309 (42.1) | 62 (35.8)  | 0.132  |
| Inadequate physical activity‡                     | 610 (58.8) | 464 (55.6) | 146 (74.1) | <0.001 |
| Comorbidity                                       |            |            |            |        |
| Hypertension                                      | 383 (36.9) | 289 (34.5) | 94 (47.2)  | 0.001  |
| Diabetes                                          | 161 (15.5) | 118 (14.1) | 43 (21.6)  | 0.008  |
| Ischemic heart diseases                           | 51 (4.9)   | 42 (5.0)   | 9 (4.5)    | 0.774  |
| Stroke                                            | 32 (3.1)   | 17 (2.0)   | 15 (7.5)   | <0.001 |
| Depression                                        | 58 (5.6)   | 45 (5.4)   | 13 (6.5)   | 0.521  |
| Cancer site§                                      |            |            |            | 0.052  |
| Stomach                                           | 194 (18.7) | 149 (17.8) | 45 (22.6)  |        |
| Colorectum                                        | 134 (12.9) | 103 (12.3) | 31 (15.6)  |        |

|                                 |            |            |           |        |
|---------------------------------|------------|------------|-----------|--------|
| Liver                           | 31 (3.0)   | 24 (2.9)   | 7 (3.5)   |        |
| Breast <sup>  </sup>            | 134 (21.3) | 111 (22.9) | 23 (18.7) |        |
| Cervix <sup>  </sup>            | 117 (18.6) | 95 (18.8)  | 22 (17.9) |        |
| Lung                            | 37 (3.6)   | 31 (3.7)   | 6 (3.0)   |        |
| Thyroid                         | 217 (20.9) | 195 (23.3) | 22 (11.1) |        |
| Prostate <sup>  </sup>          | 42 (10.3)  | 32 (9.6)   | 10 (13.2) |        |
| Other                           | 184 (17.7) | 145 (17.3) | 39 (19.6) |        |
| EQ-5D (moderate/severe problem) |            |            |           |        |
| Mobility                        | 230 (22.2) | 142 (16.9) | 88 (44.2) | <0.001 |
| Self-care                       | 42 (4.1)   | 20 (2.4)   | 22 (11.1) | <0.001 |
| Usual activities                | 135 (13.0) | 78 (9.3)   | 57 (28.6) | <0.001 |
| Pain/discomfort                 | 291 (28.1) | 205 (24.5) | 86 (43.2) | <0.001 |
| Anxiety/depression              | 127 (12.2) | 91 (10.9)  | 36 (18.1) | 0.005  |

Data are given as mean±standard deviation or number (%). P-value were analyzed by t-test or chi-square test.

\*Defined as less than 29.7/19.7 kg (for men/women); †Defined as consuming more than 7/5 (for men/women) drinks on a single occasion at least twice a week; ‡Defined as less than 150 minutes per week; § Allows for patient to have more than one type of cancer; ||Percentage is limited to women for breast/cervical cancer and to men for prostate cancer.

Abbreviations: HGS: hand grip strength; BMI: body mass index; EQ-5D: EuroQol-5 dimension

1  
2  
3  
4  
5 The patterns of impairment of EQ-5D differed depending on age group, as shown in Figure 2.  
6  
7 In the 61–70-years age group, the prevalence of pain/discomfort was very high, and there was  
8  
9 a significant difference in the percentage of those having problems between the normal and  
10  
11 weak HGS groups in terms of self-care, usual activity, and pain/discomfort. Overall,  
12  
13 participants aged 20–60 years were less likely to have any problems in the EQ-5D compared  
14  
15 with those aged 61–70 years. However, the overall patterns of impairment in the EQ-5D (shown  
16  
17 as a Radar chart plot) showed similar shapes between 20–60 and 61–70-year age groups. The  
18  
19 71–80-year age group showed a unique pattern in the EQ-5D compared with those of the other  
20  
21 age groups. Problems in the mobility domain were more frequent, and there were significant  
22  
23 differences in the percentages of participants having problems in the anxiety/depression  
24  
25 dimension as well as mobility, self-care, and usual activity between normal and weak HGS  
26  
27 group, while there was no difference in the pain/discomfort dimension.  
28  
29  
30  
31

32  
33 When the participants were divided into three groups according to the degree of problems  
34  
35 according to the EQ-5D (no problem/moderate problem/severe problem), the mean HGS tended  
36  
37 to decrease as the severity of the impairment increased in all the dimensions except for  
38  
39 anxiety/depression for men and in all the dimensions for women (Figure 3)  
40  
41

42  
43 Logistic regression analysis was performed to confirm the association between HGS and  
44  
45 HRQoL represented by the five dimensions of the EQ-5D according to sex. All three models  
46  
47 were used for logistic regression analysis. The first model was adjusted for just age, and the  
48  
49 fully adjusted model included all covariables, showing a significant correlation in simple  
50  
51 correlation. Finally, selective adjustment was performed by backward elimination with the  
52  
53 significance set at  $p < 0.05$ . The results of the logistic analysis are shown in Table 2. In the  
54  
55 selectively adjusted model, the odds ratio (OR) for impairment of HRQoL decreased  
56  
57 significantly (range, 0.90–0.94) per 1-kg increase in HGS in terms of mobility, self-care, usual  
58  
59  
60

activity, and pain/discomfort but not for anxiety/depression in men. In women, there was a similar association between HGS and HRQoL in all dimensions except for anxiety/depression after selective adjustment.

**Table 2.** Logistic regression analysis of the associations between hand grip strength (per 1-kg increase) and impaired status of health-related quality of life\* (five dimensions of the EQ-5D)

|                    | Adjusted for age |         | Fully adjusted†  |         | Selectively adjusted‡ |         |
|--------------------|------------------|---------|------------------|---------|-----------------------|---------|
|                    | OR (95% CI)      | P value | OR (95% CI)      | P value | OR (95% CI)           | P-value |
| <b>Men</b>         |                  |         |                  |         |                       |         |
| Mobility           | 0.93 (0.89-0.97) | 0.001   | 0.94 (0.90-0.98) | 0.008   | 0.94 (0.90-0.99)      | 0.011   |
| Self-care          | 0.89 (0.82-0.95) | 0.001   | 0.89 (0.81-0.97) | 0.010   | 0.90 (0.84-0.98)      | 0.011   |
| Usual activity     | 0.92 (0.88-0.97) | 0.001   | 0.92 (0.87-0.97) | 0.004   | 0.93 (0.88-0.97)      | 0.002   |
| Pain/discomfort    | 0.94 (0.91-0.98) | 0.002   | 0.95 (0.90-0.99) | 0.013   | 0.94 (0.91-0.98)      | 0.002   |
| Anxiety/depression | 0.95 (0.90-1.00) | 0.034   | 0.97 (0.92-1.00) | 0.341   | 0.96 (0.92-1.01)      | 0.118   |
| <b>Women</b>       |                  |         |                  |         |                       |         |
| Mobility           | 0.93 (0.89-0.98) | 0.009   | 0.93 (0.88-0.99) | 0.021   | 0.93 (0.88-0.99)      | 0.018   |



|    |            |                  |       |                  |       |                  |       |
|----|------------|------------------|-------|------------------|-------|------------------|-------|
| 1  |            |                  |       |                  |       |                  |       |
| 2  |            |                  |       |                  |       |                  |       |
| 3  | Self-care  | 0.95 (0.86-1.05) | 0.288 | 0.92 (0.81-1.03) | 0.155 | 0.86 (0.77-0.95) | 0.003 |
| 4  |            |                  |       |                  |       |                  |       |
| 5  |            |                  |       |                  |       |                  |       |
| 6  | Usual      | 0.91 (0.86-0.97) | 0.003 | 0.92 (0.85-0.98) | 0.017 | 0.91 (0.84-0.97) | 0.006 |
| 7  |            |                  |       |                  |       |                  |       |
| 8  | activity   |                  |       |                  |       |                  |       |
| 9  |            |                  |       |                  |       |                  |       |
| 10 |            |                  |       |                  |       |                  |       |
| 11 | Pain/      | 0.94 (0.90-0.98) | 0.003 | 0.93 (0.89-0.98) | 0.004 | 0.93 (0.88-0.97) | 0.002 |
| 12 |            |                  |       |                  |       |                  |       |
| 13 | discomfort |                  |       |                  |       |                  |       |
| 14 |            |                  |       |                  |       |                  |       |
| 15 |            |                  |       |                  |       |                  |       |
| 16 | Anxiety/   | 0.95 (0.90-1.01) | 0.077 | 0.97 (0.91-1.03) | 0.313 | 0.97 (0.92-1.02) | 0.234 |
| 17 |            |                  |       |                  |       |                  |       |
| 18 | depression |                  |       |                  |       |                  |       |
| 19 |            |                  |       |                  |       |                  |       |

\*Impaired status of health-related quality of life: some or extreme problem in EQ-5D domains.

†Adjusted for age, body mass index, education, household income, residential area, marital status, smoking, alcohol drinking, and physical activity, comorbidities (hypertension, diabetes, ischemic heart disease, stroke, and depression).

‡Backward elimination method was used with significance set at  $p < 0.05$ .

## DISCUSSION

The major findings of this study are that weak HGS is significantly associated with having a poor HRQoL in cancer survivors among a representative population sample, according to the EQ-5D. Particularly, in multivariate analysis, the risk of impaired HRQoL was significantly reduced when HGS was increased in all dimensions of the EQ-5D except for anxiety/depression. The OR for impaired HRQoL ranged from 0.86 to 0.97 per 1-kg increase on HGS in four dimensions (mobility, self-care, usual activity, and pain/discomfort).

In the present study, the mean HGS value of cancer survivors by age was not different from that previously reported for the Korean general population.<sup>18 19</sup> The reasons might be that patients with poor physical condition were excluded by chance due to the nature of the

1  
2  
3 KNHANES or that most cancer survivors have well-managed physical function. However,  
4  
5 these results were similar to those of a previous small-sized study. Morishita et al. reported no  
6  
7 difference in muscle strength between cancer survivors and healthy subjects. More importantly,  
8  
9 they suggested that cancer survivors showed a meaningful correlation between muscle strength  
10  
11 and HRQoL, whereas there was no association in healthy subjects.<sup>20</sup> These results provided a  
12  
13 basis for the need to monitor and rehabilitate muscle strength in cancer survivors.  
14  
15

16  
17 The pain/discomfort dimension showed the highest proportion of participants with problem,  
18  
19 accounting for 28.1% of the participating cancer survivors; this was followed by mobility  
20  
21 (22.2%), usual activity (13.0%), anxiety/depression (12.2%) and self-care (4.1%) dimensions.  
22

23  
24 These results were consistent with previous findings.<sup>9 21</sup> Additionally, it was well known that  
25  
26 cancer survivors had a lower quality of life, which represented the impairment of not only  
27  
28 physical function but also mental health, compared with those in non-cancer populations.<sup>9 22 23</sup>  
29

30  
31 Because HGS is a direct measure of muscle strength, it is an important predictor of muscle mass  
32  
33 and overall muscle strength and also reflects part of the physical function.<sup>12 13</sup> The HGS showed  
34  
35 a strong correlation with the pain/discomfort dimension as well as the dimensions presumed to  
36  
37 be directly related to physical function in cancer survivors such as mobility, self-care, and usual  
38  
39 activity. There is evidence indicating that pain is related to muscle strength. Some studies  
40  
41 showed that experimental pain reduced muscle strength directly<sup>24</sup> and others suggested that  
42  
43 variables such as psychosocial factors might affect both muscle strength and pain.<sup>25</sup>  
44  
45

46  
47 The cancer survivors with weak HGS had significantly more anxiety/depression problems  
48  
49 compared with those with normal HGS. However, after adjusting for covariates, the  
50  
51 anxiety/depression dimension showed the weakest association with HGS in comparison with  
52  
53 other dimensions. Other studies have shown similar results suggesting that HGS was positively  
54  
55 correlated with global, physical, and environmental domains but not with the psychological  
56  
57 domain in quality of life.<sup>26</sup> However, opposite results have also been reported. Lene et al.  
58  
59  
60

1  
2  
3 observed that HGS was correlated with not only mobility and physical function but also the  
4 mental component of HRQoL.<sup>27</sup> Recently, many studies have assessed the relationship between  
5 HGS and depression in the general population or elderly.<sup>17 28</sup> Most have shown a positive  
6 correlation; in particular, a longitudinal study with a six-year follow-up period reported that  
7 weak HGS increased the risk of depression.<sup>28</sup> In recent years, cytokines such as brain-derived  
8 neurotrophic factor (BDNF) and several interleukins (IL-6, IL-7, IL-15) have been reported to  
9 be secreted by skeletal muscle and act on the brain, ultimately affecting cognitive function.<sup>29</sup>  
10  
11  
12  
13  
14  
15  
16  
17  
18  
19  
20  
21  
22  
23  
24  
25  
26  
27  
28  
29  
30  
31  
32  
33  
34  
35  
36  
37  
38  
39  
40  
41  
42  
43  
44  
45  
46  
47  
48  
49  
50  
51  
52  
53  
54  
55  
56  
57  
58  
59  
60

<sup>30</sup> One study suggested that low BDNF levels were associated with cognitive impairment and that high IL-6 levels were strongly associated with depression in cancer patients.<sup>31</sup> HGS was also strongly correlated with the anxiety/depression domain only for elderly over 70 years of age in the age-based analysis in the present study. Taking the above into consideration, the time factor may need to be considered to confirm the association between HGS and anxiety/depression domain. Therefore, longitudinal studies are necessary.

This study has significant strength as a large-scale study using a nationally representative sample. To the best of our knowledge, this is the first study to evaluate the correlation between HGS and HRQoL in cancer survivors. Previous studies have investigated the relationships in the general population or in other disease settings<sup>15 26 27</sup> or have assessed other endpoints such as cognitive dysfunction.<sup>32</sup> As the number of cancer survivors has rapidly increased and monitoring and managing the quality of life of cancer survivors has become important, the results of this study are noteworthy. The results of this study suggest the possibility of weak HGS as a tool to predict poor HRQoL in cancer survivors. In addition, the measurement of HGS is easy, fast, inexpensive, reproducible, and reliable enough to be used in clinical practice to monitor patient quality of life.

A major limitation of this study was its cross-sectional designs, which makes it difficult to assess causality between HGS and quality of life. It is possible that poor physical function

1  
2  
3 represented by weak HGS may have been the direct cause of poor quality of life. Conversely,  
4 cancer survivors with better HRQoL may be more independent, so that the physical function is  
5 well maintained. Of course, both may behave in a bidirectional way. Second, there may be a  
6 selection bias, even if this survey was well-designed to include a sample representing the  
7 Korean population. Subjects who died early or cancer survivors living in nursing homes or  
8 long-term care facilities may not have been included in this study. In addition, there was a  
9 possibility of underreporting because it was a self-reporting system about the history of cancer.  
10 Third, we did not collect detailed medical information related to cancer such as cancer stage,  
11 types of cancer treatments, and family history of cancer. Fourth, since our data were confined  
12 to the Korean population, the results cannot be generalized to other ethnic populations. Finally,  
13 there was a disadvantage that the cut-off value of the HGS used in this study was arbitrarily  
14 determined. We classified the normal HGS group and the weak HGS group as the lowest  
15 quintiles ( 29.7 kg for men and 19.7 kg for women). These values were similar to the cut-off  
16 values for low muscle strength of 30 kg for men and 20 kg for women for diagnosing sarcopenia  
17 defined by European Working Group on Sarcopenia in Older People (EWGSOP).<sup>33</sup> Although  
18 the recently updated guideline recommended the low cut-off value for low muscle strength of  
19 27 kg for men and 16 kg for women by the European Working Group on Sarcopenia in Older  
20 People 2 (EWGSOP2)<sup>34</sup>, we could not analyze data according to these values since the number  
21 of cases under 27 kg for men and 16 kg for women was extremely small.  
22  
23  
24  
25  
26  
27  
28  
29  
30  
31  
32  
33  
34  
35  
36  
37  
38  
39  
40  
41  
42  
43  
44  
45  
46  
47  
48

## 49 **Conclusion**

50  
51 Our results from a large population-based sample show that HGS is significantly associated  
52 with HRQoL in cancer survivors. HGS can be used as a predictor of quality of life in cancer  
53 survivors as it is easy, inexpensive, and reliable. The anxiety/depression dimension had a  
54 relatively weak correlation with HGS compared with those of mobility, self-care, usual activity,  
55  
56  
57  
58  
59  
60

1  
2  
3 and pain/discomfort. Future prospective studies on the management of weak HGS in cancer  
4 survivors will increase understanding of the causal relationships and determine the clinical  
5 implications.  
6  
7  
8  
9

## 10 11 12 13 **ACKNOWLEDGMENTS**

14  
15 The authors thank the Korea Centers for Disease Control and Prevention, who performed the  
16 KNHANES.  
17  
18  
19

## 20 21 22 23 **AUTHOR DISCLOSURES**

### 24 25 **Funding statement**

26  
27 This research did not receive any specific grants from funding agencies in the public,  
28 commercial, or not-for-profit sectors.  
29  
30  
31  
32

### 33 34 35 **Competing interests statement**

36  
37 There are no known conflicts of interest associated with this publication.  
38  
39  
40  
41  
42  
43

### 44 45 **Data sharing statement:**

46  
47 Data will be available if requested.  
48  
49  
50

## 51 52 **AUTHOR CONTRIBUTIONS**

53  
54 YJC: conceived the study question and contributed to the study design, supervision of data  
55 collection, data analysis and interpretation, and writing of the manuscript.  
56  
57  
58  
59  
60

1  
2  
3 JKP: contributed to the study design and undertook data collection, analysis, and interpretation  
4  
5 and writing of the manuscript.  
6  
7  
8  
9  
10  
11  
12  
13  
14  
15  
16  
17  
18  
19  
20  
21  
22  
23  
24  
25  
26  
27  
28  
29  
30  
31  
32  
33  
34  
35  
36  
37  
38  
39  
40  
41  
42  
43  
44  
45  
46  
47  
48  
49  
50  
51  
52  
53  
54  
55  
56  
57  
58  
59  
60

For peer review only

**REFERENCES**

- 1 Siegel RL, Miller KD, Jemal A. Cancer statistics, 2018. *CA Cancer J Clin* 2018;68:7–30. doi: 10.3322/caac.21442 [published Online First: 1 October 2018].
- 2 Jung KW, Won YJ, Kong HJ, et al. Cancer statistics in Korea: incidence, mortality, survival, and prevalence in 2016. *Cancer Res Treat* 2019 doi: 10.4143/crt.2019.138 [published Online First: 28 March 2019].
- 3 Rowland JH, Yancik R. Cancer survivorship: the interface of aging, comorbidity, and quality care. *J Natl Cancer Inst* 2006;98:504–5. doi: 10.1093/jnci/djj154 [published Online First: 20 April 2006].
- 4 Lustberg MB, Reinbolt RE, Shapiro CL. Bone health in adult cancer survivorship. *J Clin Oncol* 2012;30:3665–74. doi: 10.1200/JCO.2012.42.2097 [published Online First: 26 September 2012].
- 5 Kenzik KM, Morey MC, Cohen HJ, et al. Symptoms, weight loss, and physical function in a lifestyle intervention study of older cancer survivors. *J Geriatr Oncol* 2015;6:424–32. doi: 10.1016/j.jgo.2015.08.004 [published Online First: 13 September 2015].
- 6 Stein KD, Syrjala KL, Andrykowski MA. Physical and psychological long-term and late effects of cancer. *Cancer* 2008;112:2577–92. doi: 10.1002/cncr.23448 [published Online First: 23 April 2008].
- 7 Annunziata MA, Muzzatti B, Flaiban C, et al. Long-term quality of life profile in oncology: a comparison between cancer survivors and the general population. *Support Care Cancer* 2018;26:651–56. doi: 10.1007/s00520-017-3880-8 [published Online First: 18 September 2017].
- 8 Annunziata MA, Muzzatti B, Giovannini L, et al. Is long-term cancer survivors' quality of

- 1  
2  
3 life comparable to that of the general population? An Italian study. *Support Care Cancer*  
4 2015;23:2663–8. doi: 10.1007/s00520-015-2628-6 [published Online First: 4 February  
5 2015].  
6  
7  
8  
9  
10 9 Oh MG, Han MA, Park CY, et al. Health-related quality of life among cancer survivors in  
11 Korea: the Korea National Health and Nutrition Examination Survey. *Jpn J Clin Oncol*  
12 2014;44:153–8. doi: 10.1093/jjco/hyt187 [published Online First: 4 December 2013].  
13  
14  
15  
16  
17 10 Gunther CM, Burger A, Rickert M, et al. Grip strength in healthy Caucasian adults: reference  
18 values. *J Hand Surg Am* 2008;33:558–65. doi: 10.1016/j.jhsa.2008.01.008 [published  
19 Online First: 15 April 2008].  
20  
21  
22  
23  
24 11 Bohannon RW. Test-retest reliability of measurements of hand-grip strength obtained by  
25 dynamometry from older adults: a systematic review of research in the PubMed  
26 database. *J Frailty Aging* 2017;6:83–87. doi: 10.14283/jfa.2017.8 [published Online  
27 First: 31 May 2017].  
28  
29  
30  
31  
32  
33 12 Bohannon RW. Hand-grip dynamometry predicts future outcomes in aging adults. *J Geriatr*  
34 *Phys Ther* 2008;31:3–10. [published Online First: 21 May 2008].  
35  
36  
37  
38 13 Bohannon RW. Muscle strength: clinical and prognostic value of hand-grip dynamometry.  
39 *Curr Opin Clin Nutr Metab Care* 2015;18:465–70. doi:  
40 10.1097/MCO.000000000000202 [published Online First: 7 July 2015].  
41  
42  
43  
44 14 Cheung CL, Nguyen US, Au E, et al. Association of handgrip strength with chronic diseases  
45 and multimorbidity: a cross-sectional study. *Age (Dordr)* 2013;35:929–41. doi:  
46 10.1007/s11357-012-9385-y [published Online First: 9 February 2012].  
47  
48  
49  
50  
51 15 Rashed AM, Abdel-Wahab N, Moussa EMM, et al. Association of hand grip strength with  
52 disease activity, disability and quality of life in children and adolescents with Juvenile  
53 Idiopathic Arthritis. *Adv Rheumatol* 2018;58:11. doi: 10.1186/s42358-018-0012-1  
54  
55  
56  
57  
58  
59  
60



- 1  
2  
3 16 Nishikawa H, Enomoto H, Yoh K, et al. Health-related quality of life in chronic liver  
4  
5 diseases: a strong impact of hand grip strength. *J Clin Med* 2018;7(12) doi:  
6  
7 10.3390/jcm7120553 [published Online First: 19 December 2018].  
8  
9
- 10 17 Lee MR, Jung SM, Bang H, et al. The association between muscular strength and depression  
11  
12 in Korean adults: a cross-sectional analysis of the sixth Korea National Health and  
13  
14 Nutrition Examination Survey (KNHANES VI) 2014. *BMC Public Health*  
15  
16 2018;18:1123. doi: 10.1186/s12889-018-6030-4 [published Online First: 17 September  
17  
18 2018].  
19  
20
- 21 18 Kim CR, Jeon YJ, Kim MC, et al. Reference values for hand grip strength in the South  
22  
23 Korean population. *PLoS One* 2018;13:e0195485. doi: 10.1371/journal.pone.0195485  
24  
25 [published Online First: 7 April 2018].  
26  
27
- 28 19 Yoo JI, Choi H, Ha YC. Mean Hand grip strength and cut-off value for sarcopenia in Korean  
29  
30 adults using KNHANES VI. *J Korean Med Sci* 2017;32:868–72. doi:  
31  
32 10.3346/jkms.2017.32.5.868 [published Online First: 6 April 2017].  
33  
34
- 35 20 Morishita S, Tsubaki A, Fu JB, et al. Cancer survivors exhibit a different relationship  
36  
37 between muscle strength and health-related quality of life/fatigue compared to healthy  
38  
39 subjects. *Eur J Cancer Care (Engl)* 2018;27:e12856. doi: 10.1111/ecc.12856 [published  
40  
41 Online First: 17 May 2018].  
42  
43
- 44 21 Glaser AW, Fraser LK, Corner J, et al. Patient-reported outcomes of cancer survivors in  
45  
46 England 1-5 years after diagnosis: a cross-sectional survey. *BMJ Open* 2013;3(4) doi:  
47  
48 10.1136/bmjopen-2012-002317 [published Online First: 13 April 2013].  
49  
50
- 51 22 Sanchez-Jimenez A, Cantarero-Villanueva I, Delgado-Garcia G, et al. Physical impairments  
52  
53 and quality of life of colorectal cancer survivors: a case-control study. *Eur J Cancer*  
54  
55 *Care (Engl)* 2015;24:642–9. doi: 10.1111/ecc.12218 [published Online First: 25 July  
56  
57 2014].  
58  
59  
60

- 1  
2  
3 23 Claridy MD, Ansa B, Damus F, et al. Health-related quality of life of African-American  
4  
5 female breast cancer survivors, survivors of other cancers, and those without cancer.  
6  
7 *Qual Life Res* 2018;27:2067–75. doi: 10.1007/s11136-018-1862-z [published Online  
8  
9 First: 29 April 2018].
- 10  
11  
12 24 Henriksen M, Rosager S, Aaboe J, et al. Experimental knee pain reduces muscle strength. *J*  
13  
14 *Pain* 2011;12:460–7. doi: 10.1016/j.jpain.2010.10.004 [published Online First: 15  
15  
16 December 2010].
- 17  
18  
19 25 Baert IAC, Meeus M, Mahmoudian A, et al. Do psychosocial factors predict muscle strength,  
20  
21 pain, or physical performance in patients With knee osteoarthritis? *J Clin Rheumatol*  
22  
23 2017;23:308-16. doi: 10.1097/RHU.0000000000000560 [published Online First: 18  
24  
25 August 2017].
- 26  
27  
28 26 Musalek C, Kirchengast S. Grip strength as an indicator of health-related quality of life in  
29  
30 old age-a pilot study. *Int J Environ Res Public Health* 2017;14(12) doi:  
31  
32 10.3390/ijerph14121447 [published Online First: 1 December 2017].
- 33  
34  
35 27 Jakobsen LH, Rask IK, Kondrup J. Validation of handgrip strength and endurance as a  
36  
37 measure of physical function and quality of life in healthy subjects and patients.  
38  
39 *Nutrition* 2010;26:542–50. doi: 10.1016/j.nut.2009.06.015 [published Online First: 7  
40  
41 October 2009].
- 42  
43  
44 28 Fukumori N, Yamamoto Y, Takegami M, et al. Association between hand-grip strength and  
45  
46 depressive symptoms: Locomotive Syndrome and Health Outcomes in Aizu Cohort  
47  
48 Study (LOHAS). *Age Ageing* 2015;44:592–8. doi: 10.1093/ageing/afv013 [published  
49  
50 Online First: 26 February 2015].
- 51  
52  
53 29 Pedersen BK. Muscle as a secretory organ. *Compr Physiol* 2013;3:1337-62. doi:  
54  
55 10.1002/cphy.c120033 [published Online First: 31 July 2013].
- 56  
57  
58 30 Ng T, Teo SM, Yeo HL, et al. Brain-derived neurotrophic factor genetic polymorphism  
59  
60

- 1  
2  
3 (rs6265) is protective against chemotherapy-associated cognitive impairment in patients  
4 with early-stage breast cancer. *Neuro Oncol* 2016;18:244–51. doi:  
5 10.1093/neuonc/nov162 [published Online First: 21 August 2015].  
6  
7  
8  
9  
10 31 Jehn CF, Becker B, Flath B, et al. Neurocognitive function, brain-derived neurotrophic factor  
11 (BDNF) and IL-6 levels in cancer patients with depression. *J Neuroimmunol*  
12 2015;287:88–92. doi: 10.1016/j.jneuroim.2015.08.012 [published Online First: 7  
13 October 2015].  
14  
15  
16  
17  
18  
19 32 Yang L, Koyanagi A, Smith L, et al. Hand grip strength and cognitive function among  
20 elderly cancer survivors. *PLoS One* 2018;13:e0197909. doi:  
21 10.1371/journal.pone.0197909 [published Online First: 5 June 2018].  
22  
23  
24  
25  
26 33 Cruz-Jentoft AJ, Baeyens JP, Bauer JM, et al. Sarcopenia: European consensus on definition  
27 and diagnosis: Report of the European Working Group on Sarcopenia in Older People.  
28 *Age Ageing* 2010;39:412–23. doi: 10.1093/ageing/afq034 [published Online First: 16  
29 April 2010].  
30  
31  
32  
33  
34  
35 34 Cruz-Jentoft AJ, Bahat G, Bauer J, et al. Sarcopenia: revised European consensus on  
36 definition and diagnosis. *Age Ageing* 2019;48:16–31. doi: 10.1093/ageing/afy169  
37 [published Online First: 13 October 2018].  
38  
39  
40  
41  
42  
43  
44  
45  
46  
47  
48  
49  
50  
51  
52  
53  
54  
55  
56  
57  
58  
59  
60

## FIGURE LEGENDS

**Figure 1. Flow diagram of participant selection (KNHANES VI-VII, Korea National Health and Nutrition Examination Survey VI-VII).**

**Figure 2. Radar chart plot of the percentages of participants with impaired of health-related quality of life according to age group.** An asterisk indicates a significantly (p-value <0.05) larger percentage of impairment in health-related quality of life (some or extreme problems in EQ-5D dimensions) in the weak hand strength group compared with that in the normal group. MO: mobility; SC: self-care, UA: usual activity; PD: pain/discomfort; AD: anxiety/depression; HGS: hand grip strength.

**Figure 3. Comparisons of hand grip strengths according to three levels of health-related quality of life for each dimension.** The trend of hand grip strength according to the severity of dimension was assessed using Jonckheere-Terpstra tests. EQ-5D: EuroQol-5 dimension

1  
2  
3  
4  
5  
6  
7  
8  
9  
10  
11  
12  
13  
14  
15  
16  
17  
18  
19  
20  
21  
22  
23  
24  
25  
26  
27  
28  
29  
30  
31  
32  
33  
34  
35  
36  
37  
38  
39  
40  
41  
42  
43  
44  
45  
46  
47  
48  
49  
50  
51  
52  
53  
54  
55  
56  
57  
58  
59  
60

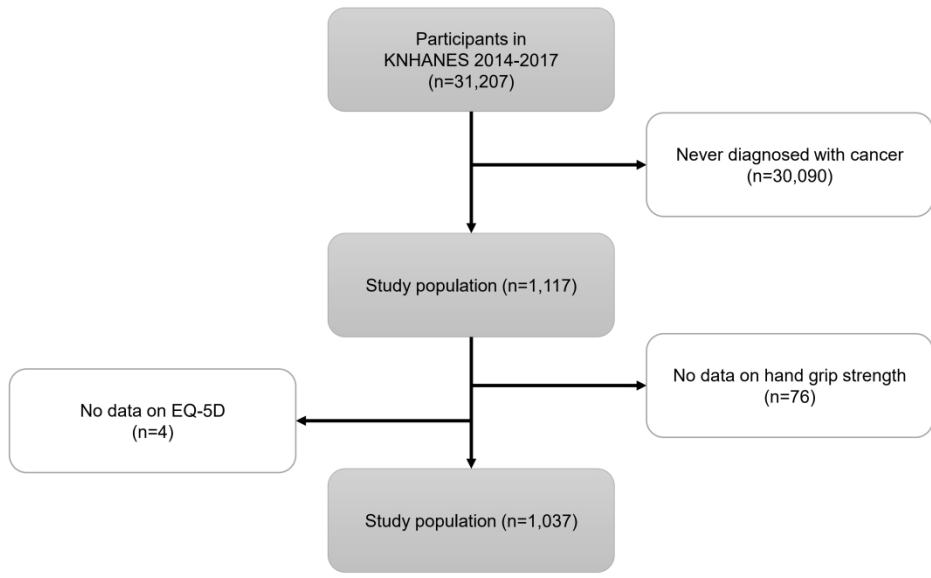

Figure 1. Flow diagram of participant selection (KNHANES VI-VII, Korea National Health and Nutrition Examination Survey VI-VII).

1196x751mm (96 x 96 DPI)

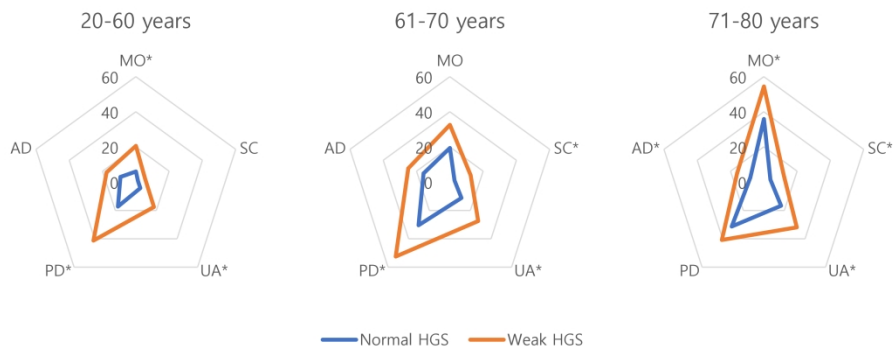

Figure 2. Radar chart plot of the percentages of participants with impaired of health-related quality of life according to age group. An asterisk indicates a significantly (p-value <0.05) larger percentage of impairment in health-related quality of life (some or extreme problems in EQ-5D dimensions) in the weak hand strength group compared with that in the normal group. MO: mobility; SC: self-care, UA: usual activity; PD: pain/discomfort; AD: anxiety/depression; HGS: hand grip strength.

1009x444mm (96 x 96 DPI)

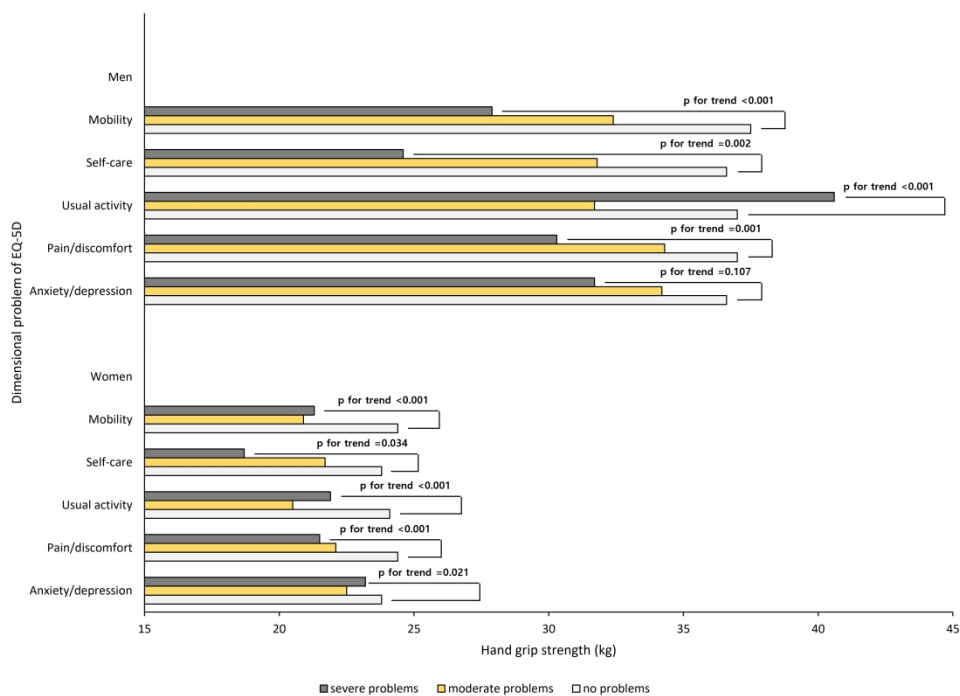

Figure 3. Comparisons of hand grip strengths according to three levels of health-related quality of life for each dimension. The trend of hand grip strength according to the severity of dimension was assessed using Jonckheere-Terpstra tests. EQ-5D: EuroQol-5 dimension

1216x880mm (96 x 96 DPI)

# Reporting checklist for cross sectional study.

Based on the STROBE cross sectional guidelines.

## Instructions to authors

Complete this checklist by entering the page numbers from your manuscript where readers will find each of the items listed below.

Your article may not currently address all the items on the checklist. Please modify your text to include the missing information. If you are certain that an item does not apply, please write "n/a" and provide a short explanation.

Upload your completed checklist as an extra file when you submit to a journal.

In your methods section, say that you used the STROBE cross sectional reporting guidelines, and cite them as:

von Elm E, Altman DG, Egger M, Pocock SJ, Gøtzsche PC, Vandenbroucke JP. The Strengthening the Reporting of Observational Studies in Epidemiology (STROBE) Statement: guidelines for reporting observational studies.

|                        |     | Reporting Item                                                                                                                  | Page Number |
|------------------------|-----|---------------------------------------------------------------------------------------------------------------------------------|-------------|
| Title                  | #1a | Indicate the study's design with a commonly used term in the title or the abstract                                              | 1           |
| Abstract               | #1b | Provide in the abstract an informative and balanced summary of what was done and what was found                                 | 3           |
| Background / rationale | #2  | Explain the scientific background and rationale for the investigation being reported                                            | 6           |
| Objectives             | #3  | State specific objectives, including any prespecified hypotheses                                                                | 7           |
| Study design           | #4  | Present key elements of study design early in the paper                                                                         | 7           |
| Setting                | #5  | Describe the setting, locations, and relevant dates, including periods of recruitment, exposure, follow-up, and data collection | 7           |
| Eligibility criteria   | #6a | Give the eligibility criteria, and the sources and methods of selection of participants.                                        | 7           |



|    |                  |      |                                                                   |     |
|----|------------------|------|-------------------------------------------------------------------|-----|
| 1  |                  | #7   | Clearly define all outcomes, exposures, predictors, potential     | 7   |
| 2  |                  |      | confounders, and effect modifiers. Give diagnostic criteria, if   |     |
| 3  |                  |      | applicable                                                        |     |
| 4  |                  |      |                                                                   |     |
| 5  |                  |      |                                                                   |     |
| 6  | Data sources /   | #8   | For each variable of interest give sources of data and details of | 7-8 |
| 7  | measurement      |      | methods of assessment (measurement). Describe                     |     |
| 8  |                  |      | comparability of assessment methods if there is more than one     |     |
| 9  |                  |      | group. Give information separately for for exposed and            |     |
| 10 |                  |      | unexposed groups if applicable.                                   |     |
| 11 |                  |      |                                                                   |     |
| 12 |                  |      |                                                                   |     |
| 13 |                  |      |                                                                   |     |
| 14 | Bias             | #9   | Describe any efforts to address potential sources of bias         | 8-9 |
| 15 |                  |      |                                                                   |     |
| 16 |                  |      |                                                                   |     |
| 17 | Study size       | #10  | Explain how the study size was arrived at                         | 7   |
| 18 |                  |      |                                                                   |     |
| 19 | Quantitative     | #11  | Explain how quantitative variables were handled in the            | 8-9 |
| 20 | variables        |      | analyses. If applicable, describe which groupings were chosen,    |     |
| 21 |                  |      | and why                                                           |     |
| 22 |                  |      |                                                                   |     |
| 23 |                  |      |                                                                   |     |
| 24 | Statistical      | #12a | Describe all statistical methods, including those used to control | 8-9 |
| 25 | methods          |      | for confounding                                                   |     |
| 26 |                  |      |                                                                   |     |
| 27 |                  |      |                                                                   |     |
| 28 |                  | #12b | Describe any methods used to examine subgroups and                | 8-9 |
| 29 |                  |      | interactions                                                      |     |
| 30 |                  |      |                                                                   |     |
| 31 |                  |      |                                                                   |     |
| 32 |                  | #12c | Explain how missing data were addressed                           | 8-9 |
| 33 |                  |      |                                                                   |     |
| 34 |                  |      |                                                                   |     |
| 35 |                  | #12d | If applicable, describe analytical methods taking account of      | 8-9 |
| 36 |                  |      | sampling strategy                                                 |     |
| 37 |                  |      |                                                                   |     |
| 38 |                  |      |                                                                   |     |
| 39 |                  | #12e | Describe any sensitivity analyses                                 | 8-9 |
| 40 |                  |      |                                                                   |     |
| 41 | Participants     | #13a | Report numbers of individuals at each stage of study—eg           | 9   |
| 42 |                  |      | numbers potentially eligible, examined for eligibility, confirmed |     |
| 43 |                  |      | eligible, included in the study, completing follow-up, and        |     |
| 44 |                  |      | analysed. Give information separately for for exposed and         |     |
| 45 |                  |      | unexposed groups if applicable.                                   |     |
| 46 |                  |      |                                                                   |     |
| 47 |                  |      |                                                                   |     |
| 48 |                  |      |                                                                   |     |
| 49 |                  | #13b | Give reasons for non-participation at each stage                  | 7   |
| 50 |                  |      |                                                                   |     |
| 51 |                  |      |                                                                   |     |
| 52 |                  | #13c | Consider use of a flow diagram                                    | 7   |
| 53 |                  |      |                                                                   |     |
| 54 | Descriptive data | #14a | Give characteristics of study participants (eg demographic,       | 9   |
| 55 |                  |      | clinical, social) and information on exposures and potential      |     |
| 56 |                  |      | confounders. Give information separately for exposed and          |     |
| 57 |                  |      | unexposed groups if applicable.                                   |     |
| 58 |                  |      |                                                                   |     |
| 59 |                  |      |                                                                   |     |
| 60 |                  |      |                                                                   |     |

|    |                  |      |                                                                      |       |
|----|------------------|------|----------------------------------------------------------------------|-------|
| 1  |                  | #14b | Indicate number of participants with missing data for each           | 7     |
| 2  |                  |      | variable of interest                                                 |       |
| 3  |                  |      |                                                                      |       |
| 4  |                  |      |                                                                      |       |
| 5  | Outcome data     | #15  | Report numbers of outcome events or summary measures.                | 9-12  |
| 6  |                  |      | Give information separately for exposed and unexposed                |       |
| 7  |                  |      | groups if applicable.                                                |       |
| 8  |                  |      |                                                                      |       |
| 9  |                  |      |                                                                      |       |
| 10 | Main results     | #16a | Give unadjusted estimates and, if applicable, confounder-            | 13-15 |
| 11 |                  |      | adjusted estimates and their precision (eg, 95% confidence           |       |
| 12 |                  |      | interval). Make clear which confounders were adjusted for and        |       |
| 13 |                  |      | why they were included                                               |       |
| 14 |                  |      |                                                                      |       |
| 15 |                  |      |                                                                      |       |
| 16 |                  |      |                                                                      |       |
| 17 |                  | #16b | Report category boundaries when continuous variables were            | 13-14 |
| 18 |                  |      | categorized                                                          |       |
| 19 |                  |      |                                                                      |       |
| 20 |                  |      |                                                                      |       |
| 21 |                  | #16c | If relevant, consider translating estimates of relative risk into    | 14-15 |
| 22 |                  |      | absolute risk for a meaningful time period                           |       |
| 23 |                  |      |                                                                      |       |
| 24 | Other analyses   | #17  | Report other analyses done—e.g., analyses of subgroups and           | 13-14 |
| 25 |                  |      | interactions, and sensitivity analyses                               |       |
| 26 |                  |      |                                                                      |       |
| 27 |                  |      |                                                                      |       |
| 28 | Key results      | #18  | Summarise key results with reference to study objectives             | 15    |
| 29 |                  |      |                                                                      |       |
| 30 |                  |      |                                                                      |       |
| 31 | Limitations      | #19  | Discuss limitations of the study, taking into account sources of     | 17-18 |
| 32 |                  |      | potential bias or imprecision. Discuss both direction and            |       |
| 33 |                  |      | magnitude of any potential bias.                                     |       |
| 34 |                  |      |                                                                      |       |
| 35 |                  |      |                                                                      |       |
| 36 | Interpretation   | #20  | Give a cautious overall interpretation considering objectives,       | 16-17 |
| 37 |                  |      | limitations, multiplicity of analyses, results from similar studies, |       |
| 38 |                  |      | and other relevant evidence.                                         |       |
| 39 |                  |      |                                                                      |       |
| 40 |                  |      |                                                                      |       |
| 41 | Generalisability | #21  | Discuss the generalisability (external validity) of the study        | 17-18 |
| 42 |                  |      | results                                                              |       |
| 43 |                  |      |                                                                      |       |
| 44 |                  |      |                                                                      |       |
| 45 | Funding          | #22  | Give the source of funding and the role of the funders for the       | 19    |
| 46 |                  |      | present study and, if applicable, for the original study on which    |       |
| 47 |                  |      | the present article is based                                         |       |
| 48 |                  |      |                                                                      |       |
| 49 |                  |      |                                                                      |       |

50 The STROBE checklist is distributed under the terms of the Creative Commons Attribution License  
 51 CC-BY. This checklist was completed on 08. April 2019 using <https://www.goodreports.org/>, a tool  
 52 made by the [EQUATOR Network](#) in collaboration with [Penelope.ai](#)  
 53  
 54  
 55  
 56  
 57  
 58  
 59  
 60

# BMJ Open

## Association between hand grip strength and impaired health-related quality of life in Korean cancer survivors: a cross-sectional study

|                                 |                                                                                                                                                                                       |
|---------------------------------|---------------------------------------------------------------------------------------------------------------------------------------------------------------------------------------|
| Journal:                        | <i>BMJ Open</i>                                                                                                                                                                       |
| Manuscript ID                   | bmjopen-2019-030938.R1                                                                                                                                                                |
| Article Type:                   | Research                                                                                                                                                                              |
| Date Submitted by the Author:   | 27-Jul-2019                                                                                                                                                                           |
| Complete List of Authors:       | paek, jeongki; Inje University Sanggye Paik Hospital, Department of Family Medicine;<br>Choi, Yoon Ji; Korea University College of Medicine and School of Medicine, Internal Medicine |
| <b>Primary Subject Heading</b>: | Oncology                                                                                                                                                                              |
| Secondary Subject Heading:      | General practice / Family practice                                                                                                                                                    |
| Keywords:                       | Korea National Health and Nutrition Examination Survey, neoplasms, cancer survivors, hand strength, quality of life                                                                   |
|                                 |                                                                                                                                                                                       |

SCHOLARONE™  
Manuscripts

1  
2  
3  
4  
5  
6 **Association between hand grip strength and impaired health-related quality of life in**  
7  
8 **Korean cancer survivors: a cross-sectional study**  
9

10  
11  
12  
13  
14  
15 Jeong Ki Paek MD<sup>1</sup>, Yoon Ji Choi MD, PhD<sup>2</sup>  
16

17  
18  
19  
20  
21 <sup>1</sup>Department of Family Medicine, SanggyePaik Hospital, Seoul, Korea  
22

23  
24 <sup>2</sup>Division of Hematology/Oncology, Department of Internal Medicine, Korea University  
25  
26 College of Medicine, Seoul, Korea  
27  
28  
29  
30  
31

32 **Authors' email addresses and contributions:**  
33

34 YJC: [yj\\_choi@korea.ac.kr](mailto:yj_choi@korea.ac.kr)  
35

36 ORCID: <http://orcid.org/0000-0002-1831-0555>  
37  
38  
39  
40  
41  
42

43 JKP: [jk.paek@paik.ac.kr](mailto:jk.paek@paik.ac.kr)  
44

45 ORCID: <http://orcid.org/0000-0002-5837-0106>  
46  
47  
48  
49  
50  
51

52 Corresponding Author: Dr. Yoon Ji Choi, Department of Internal Medicine, Korea University  
53

54 College of Medicine, Seoul, Korea Tel: +82-2-920-6267, Fax: +82-2-920-6267, Email:  
55  
56  
57

1  
2  
3 yj\_choi@korea.ac.kr  
4  
5  
6  
7  
8  
9

10  
11 **Word counts:** 2685 words (text only); **Abstract:** 249 words  
12

13  
14 Number of figures and tables: 3 figures and 2 tables  
15  
16  
17  
18  
19  
20  
21  
22  
23  
24  
25  
26  
27  
28  
29  
30  
31  
32  
33  
34  
35  
36  
37  
38  
39  
40  
41  
42  
43  
44  
45  
46  
47  
48  
49  
50  
51  
52  
53  
54  
55  
56  
57  
58  
59  
60

For peer review only

## ABSTRACT

**Objectives:** To assess the association between hand grip strength (HGS) and health-related quality of life (HRQoL) among Korean cancer survivors

**Design:** Population-based cross-sectional study

**Setting:** A nationally representative population survey data (face-to-face interviews and health examinations were performed in mobile examination centers)

**Participants:** A total of 1,037 cancer survivors (person with cancer of any type who is still living) with available data on HGS and HRQoL in the sixth and seventh Korea National Health and Nutrition Examination Surveys (KNHANES 2014-2017)

**Primary outcome measures:** Prevalence of impaired HRQoL by HGS

**Results:** Among 1,037 cancer survivors (60.7% women, mean age = 62.2 years), 19.2% of them had weak HGS according to gender-specific cut-off values (lowest quintile; <29.7 kg in men and <19.7 kg in women). In study population, the most common cancer site was the stomach, followed by the thyroid, breast, colorectal, and cervix. Individuals with weak HGS showed statistically significantly increased impairment in all five dimensions of the EuroQol-5 dimension compared with those in patients with normal HGS. In a multinomial logistic regression analysis, impaired HRQoL (some or extreme problem in EQ-5D) was significantly reduced in each dimension of the EQ-5D, except for anxiety/depression, when HGS was increased. The OR for impaired HRQoL ranged from 0.86 to 0.97 per 1 kg increase in HGS in four dimensions (mobility, self-care, usual activity, and pain/discomfort).

**Conclusions:** Weak HGS was associated with impaired HRQoL in cancer survivors. Future longitudinal studies are needed to confirm the causality between HGS and HRQoL in cancer survivors.

1  
2  
3  
4  
5 **Keywords:** Korea National Health and Nutrition Examination Survey, neoplasms, cancer  
6  
7 survivors, hand strength, quality of life  
8  
9  
10  
11  
12  
13  
14  
15  
16  
17  
18  
19  
20  
21  
22  
23  
24  
25  
26  
27  
28  
29  
30  
31  
32  
33  
34  
35  
36  
37  
38  
39  
40  
41  
42  
43  
44  
45  
46  
47  
48  
49  
50  
51  
52  
53  
54  
55  
56  
57  
58  
59  
60

For peer review only

## STRENGTHS AND LIMITATIONS OF THIS STUDY

1. This study identified that weak hand grip strength (HGS) is associated with impaired health related quality of life (HRQoL) in cancer survivors.
2. The data used in this study were derived from nationally representative and well-designed systematic surveys.
3. The cross-sectional design of this study limits the ability to establish causal-interference relationships between HGS and HRQOL.
4. Because our data were confined to the Korean population, the results cannot be generalized to other ethnic populations.



## INTRODUCTION

Cancer is a fatal and serious disease. However, with improving diagnostic and therapeutic techniques, the survival rate of cancer patients is increasing worldwide.<sup>1</sup> According to the Korea National Cancer Incidence Database, overall cancer mortality has decreased 2.7% annually since 2002, although the all-cancer incidence rate increased by 3.6% annually from 1999 to 2011, resulting in a long-term survival probability of 70.5% in the 2010s compared with the that in 1990s.<sup>2</sup>

Cancer survivor is defined as person who have been diagnosed with cancer of any type, including before, during and after treatment.<sup>3</sup> Compared with individuals in the general population, cancer survivors have increased risks of chronic diseases such as cardiovascular disease, second primary malignancy, and osteoporosis.<sup>4-6</sup> Furthermore, deterioration of physical function and psychosocial problems is common.<sup>7</sup>

As these survival issues and the life expectancy of cancer survivors have increased, health-related quality of life (HRQoL) has become an important outcome measure for survivors. HRQoL is a subjective, multidimensional concept that encompasses physical, social, functional, psychological/emotional health factors related to an individual's health. Several studies have reported that the HRQoL of cancer survivors is significantly lower than that of the non-cancer population.<sup>8-10</sup> The poor quality of life of cancer survivors is probably due to cancer itself and/or side effects of cancer treatments. Thus, there is a need to better monitor the quality of life in cancer survivors.

Hand grip strength (HGS) is a simple, fast, and reliable method for evaluating maximum voluntary squeezing force.<sup>11 12</sup> The measurement of HGS is useful not only to evaluate the qualitative and functional aspects of muscle strength in clinical practice but also to predict nutritional and general health statuses.<sup>13 14</sup> Additionally, HGS is associated with multiple chronic diseases and multimorbidity after adjusting for confounding factors.<sup>15</sup> Recent data

1  
2  
3 showed that HGS could be an independent predictor of the quality of life in various disease  
4 settings ranging from arthritis to chronic liver disease and depression.<sup>16-18</sup> In contrast, data on  
5 the impact of HGS on HRQoL in cancer survivors are lacking.  
6  
7  
8

9  
10 Given the above, we evaluated the cross-sectional associations of HGS with HRQoL among  
11 cancer survivors, using nationally representative data from the Korea National Health and  
12 Nutrition Examination Survey (KNHANES).  
13  
14  
15

## 16 17 18 19 **MATERIALS AND METHODS**

### 20 21 **Study population**

22  
23 The KNHANES is a cross-sectional, nationally representative survey that has been conducted  
24 to assess the health and nutritional status of the general population of Korea since 1998. The  
25 KNHANES uses a stratified multistage probability sampling to accurately represent the general  
26 population of South Korea. The present study analyzed data from the KNHANES VI-2,3 (2014-  
27 2015) and VII-1,2 (2016-2017). Adults who have been diagnosed with any type of cancer by a  
28 physician were included in this study as cancer survivor. As shown in Figure 1, a total of 1,037  
29 participants who met the eligibility criteria were enrolled in this study.  
30  
31  
32  
33  
34  
35  
36  
37  
38  
39

### 40 41 42 **Personal characteristics and clinical data**

43  
44 The demographic characteristics included age, sex, height, weight, body mass index (BMI),  
45 education (<10 years or ≥10 years), household income (low or high), residence (rural or urban),  
46 and marital status (living with someone or living alone). Health behaviors, including smoking  
47 status (never, former, or current), high-risk drinking, and physical activity, were also assessed.  
48 High-risk drinking was defined as the consumption of more than seven (men) or five (women)  
49 drinks on a single occasion at least twice a week. Adequate physical activity was defined as at  
50 least 30 minutes of moderate-intensity activity five days a week or at least 20 minutes of  
51  
52  
53  
54  
55  
56  
57  
58  
59  
60

1  
2  
3 vigorous physical activity three days per week. The comorbidities included hypertension,  
4 diabetes mellitus, ischemic heart disease, stroke, and depression. We collected data on cancer  
5 sites without data on current treatment and cancer-related symptoms.  
6  
7  
8  
9

### 10 11 12 **Measurement of HGS**

13  
14 HGS was measured to the nearest 0.1 kg using a digital hand dynamometer (Digital Grip  
15 Strength Dynamometer, T.K.K 5401, Takei Scientific Instruments Co., Ltd., Tokyo, Japan).  
16  
17 During the assessment, the participants were required to stand upright with their feet hip-width  
18 apart and to stretch their elbows completely. The participants were asked to apply the maximum  
19 grip strength three times for their left and right hands individually. The participants were  
20 instructed to hold the grip continuously with full force for more than 3 seconds. At least 30  
21 seconds of rest was allowed between each measurement. Grip strength was defined as the  
22 maximally measured value among the six measurements in both hands. Weak HGS was defined  
23 as the lowest quintile in both men and women.  
24  
25  
26  
27  
28  
29  
30  
31  
32  
33  
34  
35  
36  
37  
38  
39

### 40 **Assessment of HRQoL**

41 We assessed HRQoL using the EuroQoL-5 Dimension (EQ-5D), which is a standardized  
42 instrument used to measure generic health status. It has been applied to a wide range of health  
43 conditions and treatments. The EQ-5D descriptive system comprises five dimensions: mobility,  
44 self-care, usual activities, pain/discomfort, and anxiety/depression. The participants had three  
45 possible responses depending on the severity for each dimension: “no problems,” “moderate  
46 problems,” and “severe problems.” The EQ-5D instrument has been translated into Korean.  
47  
48  
49  
50  
51  
52  
53  
54  
55

### 56 **Statistical analyses**

57 We divided the participants into two groups based on HGS (normal or weak).  
58  
59  
60

1  
2  
3 The baseline characteristics are reported as means and standard deviation for all continuous  
4 variables and as frequencies and percentage for categorical variables. The differences in several  
5 covariates between the normal and weak HGS groups were assessed using Student's t-test for  
6 continuous variables and chi-square tests for categorical variables. Multiple logistic regression  
7 analyses were used to examine the associations between HGS and impaired HRQoL. All  
8 statistical analyses were performed using IBM SPSS Statistics for Windows, version 21.0 (IBM  
9 Corp., Armonk, NY, USA). A two-tailed P-value <0.05 was considered statistically significant.

### 21 **Ethics statement**

22  
23 This study's protocol for performing an analysis of the 2014–2017 KNHANES data was  
24 reviewed and approved by the Institutional Review Board of the Korea Centers for Disease  
25 Control and Prevention. Informed consent was obtained from all participants when the 2014–  
26 2017 KNHANES were conducted.

### 35 **Patient and public involvement**

36  
37 We used publicly available and de-identified KNHANES data collected by the Korea Centers  
38 for Disease Control and Prevention (KCDC) for this study. No patients were involved in the  
39 design of this study.

## 47 **RESULTS**

48  
49 Among 1,037 cancer survivors (60.7% women, mean age=62.2 years), the prevalent cancer site  
50 was the stomach, followed by the thyroid, breast, colorectum, and cervix. Overall, cancer  
51 survivors most commonly reported problems in pain/discomfort domain, followed by mobility  
52 and anxiety/depression. The sex-specific HGS cut-off values (lowest quintile) were 29.7 kg in  
53 men and 19.7 kg in women. The weak HGS group comprised 199 participants (19.2%) (18.6%

of men and 19.6% of women). Table 1 shows the characteristics of the normal and weak HGS groups. There were significant differences in several anthropometric measurements (height, weight), socio-demographic characteristics (education, household income, residential area, marital status, physical activity), and comorbidities (hypertension, diabetes, stroke). Participants with weak HGS showed significantly more impaired status for all dimensions of the EQ-5D compared with those in participants with normal HGS.

**Table 1.** Characteristics of 1,037 cancer survivors according to hand-grip strength

|                          | Total<br>(N=1,037) | Normal<br>HGS<br>(n=822) | Weak HGS*<br>(n=199) | P-value |
|--------------------------|--------------------|--------------------------|----------------------|---------|
| Age (y)                  | 62.2±12.4          | 60.3±12.1                | 70.1±10.3            | <0.001  |
| Sex, n (%)               |                    |                          |                      | 0.711   |
| Men                      | 408 (39.3)         | 332 (39.6)               | 76 (38.2)            |         |
| Women                    | 629 (60.7)         | 506 (60.4)               | 123 (61.8)           |         |
| Height (cm)              | 160.4±8.2          | 161.3±7.8                | 156.3±8.6            | <0.001  |
| Weight (kg)              | 60.7±10.1          | 61.6±10.0                | 56.7±9.3             | <0.001  |
| BMI (kg/m <sup>2</sup> ) | 23.6±3.2           | 23.6±3.3                 | 23.2±3.2             | 0.071   |
| Hand grip strength (kg)  |                    |                          |                      |         |
| Men                      | 36.3±7.7           | 38.7±6.2                 | 25.9±3.7             | <0.001  |

|    |                                                   |            |            |            |        |
|----|---------------------------------------------------|------------|------------|------------|--------|
| 1  |                                                   |            |            |            |        |
| 2  |                                                   |            |            |            |        |
| 3  | Women                                             | 23.7±4.8   | 25.3±3.6   | 16.8±2.6   | <0.001 |
| 4  |                                                   |            |            |            |        |
| 5  |                                                   |            |            |            |        |
| 6  | Education, n (%)                                  |            |            |            | <0.001 |
| 7  |                                                   |            |            |            |        |
| 8  |                                                   |            |            |            |        |
| 9  | <10 years                                         | 498 (48.0) | 365 (43.8) | 133 (66.8) |        |
| 10 |                                                   |            |            |            |        |
| 11 |                                                   |            |            |            |        |
| 12 | ≥10 years                                         | 535 (51.6) | 469 (56.2) | 66 (33.2)  |        |
| 13 |                                                   |            |            |            |        |
| 14 |                                                   |            |            |            |        |
| 15 | Income, n (%)                                     |            |            |            | <0.001 |
| 16 |                                                   |            |            |            |        |
| 17 |                                                   |            |            |            |        |
| 18 | 1 <sup>st</sup> , 2 <sup>nd</sup> quartile (low)  | 565 (54.5) | 419 (50.0) | 146 (73.4) |        |
| 19 |                                                   |            |            |            |        |
| 20 |                                                   |            |            |            |        |
| 21 | 3 <sup>rd</sup> , 4 <sup>th</sup> quartile (high) | 471 (45.4) | 419 (50.0) | 52 (26.1)  |        |
| 22 |                                                   |            |            |            |        |
| 23 |                                                   |            |            |            |        |
| 24 | Residence, n (%)                                  |            |            |            | 0.005  |
| 25 |                                                   |            |            |            |        |
| 26 |                                                   |            |            |            |        |
| 27 | Urban                                             | 722 (69.6) | 600 (71.6) | 122 (61.3) |        |
| 28 |                                                   |            |            |            |        |
| 29 |                                                   |            |            |            |        |
| 30 | Rural                                             | 315 (30.4) | 238 (28.4) | 77 (38.7)  |        |
| 31 |                                                   |            |            |            |        |
| 32 |                                                   |            |            |            |        |
| 33 | Marital status, n (%)                             |            |            |            | <0.001 |
| 34 |                                                   |            |            |            |        |
| 35 |                                                   |            |            |            |        |
| 36 | Live alone                                        | 148 (14.3) | 98 (11.7)  | 50 (25.1)  |        |
| 37 |                                                   |            |            |            |        |
| 38 |                                                   |            |            |            |        |
| 39 | Live with someone                                 | 889 (85.7) | 740 (88.3) | 149 (74.9) |        |
| 40 |                                                   |            |            |            |        |
| 41 |                                                   |            |            |            |        |
| 42 | Former/current smoking, n (%)                     | 374 (36.1) | 308 (37.2) | 66 (33.5)  | 0.339  |
| 43 |                                                   |            |            |            |        |
| 44 |                                                   |            |            |            |        |
| 45 | Problem drinking <sup>†</sup> , n (%)             | 371 (35.8) | 309 (42.1) | 62 (35.8)  | 0.132  |
| 46 |                                                   |            |            |            |        |
| 47 |                                                   |            |            |            |        |
| 48 | Inadequate physical activity <sup>‡</sup> , n     | 610 (58.8) | 464 (55.6) | 146 (74.1) | <0.001 |
| 49 | (%)                                               |            |            |            |        |
| 50 |                                                   |            |            |            |        |
| 51 |                                                   |            |            |            |        |
| 52 |                                                   |            |            |            |        |
| 53 | Comorbidity, n (%)                                |            |            |            |        |
| 54 |                                                   |            |            |            |        |
| 55 |                                                   |            |            |            |        |
| 56 | Hypertension                                      | 383 (36.9) | 289 (34.5) | 94 (47.2)  | 0.001  |
| 57 |                                                   |            |            |            |        |
| 58 |                                                   |            |            |            |        |
| 59 |                                                   |            |            |            |        |
| 60 |                                                   |            |            |            |        |

|                                        |            |            |           |        |
|----------------------------------------|------------|------------|-----------|--------|
| Diabetes                               | 161 (15.5) | 118 (14.1) | 43 (21.6) | 0.008  |
| Ischemic heart diseases                | 51 (4.9)   | 42 (5.0)   | 9 (4.5)   | 0.774  |
| Stroke                                 | 32 (3.1)   | 17 (2.0)   | 15 (7.5)  | <0.001 |
| Depression                             | 58 (5.6)   | 45 (5.4)   | 13 (6.5)  | 0.521  |
| Cancer site§, n (%)                    |            |            |           | 0.052  |
| Stomach                                | 194 (18.7) | 149 (17.8) | 45 (22.6) |        |
| Colorectum                             | 134 (12.9) | 103 (12.3) | 31 (15.6) |        |
| Liver                                  | 31 (3.0)   | 24 (2.9)   | 7 (3.5)   |        |
| Breast                                 | 134 (21.3) | 111 (22.9) | 23 (18.7) |        |
| Cervix                                 | 117 (18.6) | 95 (18.8)  | 22 (17.9) |        |
| Lung                                   | 37 (3.6)   | 31 (3.7)   | 6 (3.0)   |        |
| Thyroid                                | 217 (20.9) | 195 (23.3) | 22 (11.1) |        |
| Prostate                               | 42 (10.3)  | 32 (9.6)   | 10 (13.2) |        |
| Other                                  | 184 (17.7) | 145 (17.3) | 39 (19.6) |        |
| EQ-5D (moderate/severe problem), n (%) |            |            |           |        |
| Mobility                               | 230 (22.2) | 142 (16.9) | 88 (44.2) | <0.001 |
| Self-care                              | 42 (4.1)   | 20 (2.4)   | 22 (11.1) | <0.001 |
| Usual activities                       | 135 (13.0) | 78 (9.3)   | 57 (28.6) | <0.001 |

|                    |            |            |           |        |
|--------------------|------------|------------|-----------|--------|
| Pain/discomfort    | 291 (28.1) | 205 (24.5) | 86 (43.2) | <0.001 |
| Anxiety/depression | 127 (12.2) | 91 (10.9)  | 36 (18.1) | 0.005  |

Data are given as mean±standard deviation or number (%). P-value were analyzed by t-test or chi-square test.

\*Defined as less than 29.7/19.7 kg (for men/women); †Defined as consuming more than 7/5 (for men/women) drinks on a single occasion at least twice a week; ‡Defined as less than 150 minutes per week; § Allows for patient to have more than one type of cancer; ¶Percentage is limited to women for breast/cervical cancer and to men for prostate cancer.

Abbreviations: HGS: hand grip strength; BMI: body mass index; EQ-5D: EuroQol-5 dimension

The patterns of impairment of EQ-5D differed depending on age group, as shown in Figure 2. In the 61–70-years age group, the prevalence of pain/discomfort was very high, and there was a significant difference in the percentage of those having problems between the normal and weak HGS groups in terms of self-care, usual activity, and pain/discomfort. Overall, participants aged 20–60 years were less likely to have any problems in the EQ-5D compared with those aged 61–70 years. However, the overall patterns of impairment in the EQ-5D (shown as a Radar chart plot) showed similar shapes between 20–60 and 61–70-year age groups. The 71–80-year age group showed a unique pattern in the EQ-5D compared with those of the other age groups. Problems in the mobility domain were more frequent, and there were significant differences in the percentages of participants having problems in the anxiety/depression dimension as well as mobility, self-care, and usual activity between normal and weak HGS group, while there was no difference in the pain/discomfort dimension. Compared with the general population who never had been diagnosed with cancer, the difference in the frequency of impaired HRQoL according to weak HGS was remarkable in cancer survivors.



When the participants were divided into three groups according to the degree of problems according to the EQ-5D (no problem/moderate problem/severe problem), the mean HGS tended to decrease as the severity of the impairment increased in all the dimensions except for anxiety/depression for men and in all the dimensions for women (Figure 3)

Logistic regression analysis was performed to confirm the association between HGS and HRQoL represented by the five dimensions of the EQ-5D according to sex. All three models were used for logistic regression analysis. The first model was adjusted for just age, and the fully adjusted model included all covariables, showing a significant correlation in simple correlation. Finally, selective adjustment was performed by backward elimination with the significance set at  $p < 0.05$ . The results of the logistic analysis are shown in Table 2. In the selectively adjusted model, the odds ratio (OR) for impairment of HRQoL decreased significantly (range, 0.90–0.94) per 1-kg increase in HGS in terms of mobility, self-care, usual activity, and pain/discomfort but not for anxiety/depression in men. In women, there was a similar association between HGS and HRQoL in each dimension except for anxiety/depression after selective adjustment.

**Table 2.** Logistic regression analysis of the associations between hand grip strength (per 1-kg increase) and impaired status of health-related quality of life\* (five dimensions of the EQ-5D)

|            | Adjusted for age |         | Fully adjusted†  |         | Selectively adjusted‡ |         |
|------------|------------------|---------|------------------|---------|-----------------------|---------|
|            | OR (95% CI)      | P value | OR (95% CI)      | P value | OR (95% CI)           | P-value |
| <b>Men</b> |                  |         |                  |         |                       |         |
| Mobility   | 0.93 (0.89-0.97) | 0.001   | 0.93 (0.88-0.98) | 0.003   | 0.94 (0.90-0.99)      | 0.011   |

|    |            |                  |       |                  |       |                  |       |
|----|------------|------------------|-------|------------------|-------|------------------|-------|
| 1  |            |                  |       |                  |       |                  |       |
| 2  |            |                  |       |                  |       |                  |       |
| 3  | Self-care  | 0.89 (0.82-0.95) | 0.001 | 0.89 (0.80-0.97) | 0.009 | 0.90 (0.84-0.98) | 0.011 |
| 4  |            |                  |       |                  |       |                  |       |
| 5  |            |                  |       |                  |       |                  |       |
| 6  | Usual      | 0.92 (0.88-0.97) | 0.001 | 0.93 (0.88-0.99) | 0.015 | 0.93 (0.88-0.97) | 0.002 |
| 7  |            |                  |       |                  |       |                  |       |
| 8  | activity   |                  |       |                  |       |                  |       |
| 9  |            |                  |       |                  |       |                  |       |
| 10 |            |                  |       |                  |       |                  |       |
| 11 | Pain/      | 0.94 (0.91-0.98) | 0.002 | 0.94 (0.90-0.99) | 0.017 | 0.94 (0.91-0.98) | 0.002 |
| 12 |            |                  |       |                  |       |                  |       |
| 13 | discomfor  |                  |       |                  |       |                  |       |
| 14 |            |                  |       |                  |       |                  |       |
| 15 | t          |                  |       |                  |       |                  |       |
| 16 |            |                  |       |                  |       |                  |       |
| 17 |            |                  |       |                  |       |                  |       |
| 18 | Anxiety/   | 0.95 (0.90-1.00) | 0.034 | 0.98 (0.92-1.04) | 0.429 | 0.96 (0.92-1.01) | 0.118 |
| 19 |            |                  |       |                  |       |                  |       |
| 20 | depression |                  |       |                  |       |                  |       |
| 21 |            |                  |       |                  |       |                  |       |
| 22 |            |                  |       |                  |       |                  |       |
| 23 | Women      |                  |       |                  |       |                  |       |
| 24 |            |                  |       |                  |       |                  |       |
| 25 |            |                  |       |                  |       |                  |       |
| 26 | Mobility   | 0.93 (0.89-0.98) | 0.009 | 0.94 (0.89-1.01) | 0.074 | 0.93 (0.88-0.99) | 0.018 |
| 27 |            |                  |       |                  |       |                  |       |
| 28 |            |                  |       |                  |       |                  |       |
| 29 | Self-care  | 0.95 (0.86-1.05) | 0.288 | 0.93 (0.82-1.06) | 0.257 | 0.86 (0.77-0.95) | 0.003 |
| 30 |            |                  |       |                  |       |                  |       |
| 31 |            |                  |       |                  |       |                  |       |
| 32 | Usual      | 0.91 (0.86-0.97) | 0.003 | 0.93 (0.86-1.00) | 0.045 | 0.91 (0.84-0.97) | 0.006 |
| 33 |            |                  |       |                  |       |                  |       |
| 34 | activity   |                  |       |                  |       |                  |       |
| 35 |            |                  |       |                  |       |                  |       |
| 36 |            |                  |       |                  |       |                  |       |
| 37 | Pain/      | 0.94 (0.90-0.98) | 0.003 | 0.94 (0.89-0.98) | 0.010 | 0.93 (0.88-0.97) | 0.002 |
| 38 |            |                  |       |                  |       |                  |       |
| 39 | discomfort |                  |       |                  |       |                  |       |
| 40 |            |                  |       |                  |       |                  |       |
| 41 |            |                  |       |                  |       |                  |       |
| 42 | Anxiety/   | 0.95 (0.90-1.01) | 0.077 | 0.97 (0.90-1.03) | 0.315 | 0.97 (0.92-1.02) | 0.234 |
| 43 |            |                  |       |                  |       |                  |       |
| 44 | depression |                  |       |                  |       |                  |       |
| 45 |            |                  |       |                  |       |                  |       |
| 46 |            |                  |       |                  |       |                  |       |

\*Impaired status of health-related quality of life: some or extreme problem in EQ-5D domains.

†Adjusted for age, height, weight, education, household income, residential area, marital status, smoking, alcohol drinking, and physical activity, comorbidities (hypertension, diabetes, ischemic heart disease, stroke, and depression).

‡Backward elimination method was used with significance set at  $p < 0.05$ .

## DISCUSSION

The major findings of this study are that weak HGS is significantly associated with having a poor HRQoL in cancer survivors among a representative population sample, according to the EQ-5D. Particularly, in multivariate analysis, the risk of impaired HRQoL was significantly reduced when HGS was increased in all dimensions of the EQ-5D except for anxiety/depression. The OR for impaired HRQoL ranged from 0.86 to 0.97 per 1-kg increase on HGS in four dimensions (mobility, self-care, usual activity, and pain/discomfort).

In the present study, the mean HGS value of cancer survivors by age was not different from that previously reported for the Korean general population.<sup>19 20</sup> The reasons might be that patients with poor physical condition were excluded by chance due to the nature of the KNHANES or that most cancer survivors have well-managed physical function. However, these results were similar to those of a previous small-sized study. Morishita et al. reported no difference in muscle strength between cancer survivors and healthy subjects. More importantly, they suggested that cancer survivors showed a meaningful correlation between muscle strength and HRQoL, whereas there was no association in healthy subjects.<sup>21</sup> The results of present study were also in good agreement with this results. These results that the weak HGS is more closely related to the impaired HRQoL in cancer survivors than the general population will be a basis for the need to monitor and rehabilitate muscle strength in cancer survivors.

The pain/discomfort dimension showed the highest proportion of participants with problem, accounting for 28.1% of the participating cancer survivors; this was followed by mobility (22.2%), usual activity (13.0%), anxiety/depression (12.2%) and self-care (4.1%) dimensions. These results were consistent with previous findings.<sup>10 22</sup> Additionally, it was well known that cancer survivors had a lower quality of life, which represented the impairment of not only physical function but also mental health, compared with those in non-cancer populations.<sup>10 23</sup>

24

Because HGS is a direct measure of muscle strength, it is an important predictor of muscle mass and overall muscle strength and also reflects part of the physical function.<sup>13 14</sup> The HGS showed a strong correlation with the pain/discomfort dimension as well as the dimensions presumed to be directly related to physical function in cancer survivors such as mobility, self-care, and usual activity. There is evidence indicating that pain is related to muscle strength. Some studies showed that experimental pain reduced muscle strength directly<sup>25</sup> and others suggested that variables such as psychosocial factors might affect both muscle strength and pain.<sup>26</sup>

The cancer survivors with weak HGS had significantly more anxiety/depression problems compared with those with normal HGS. However, after adjusting for covariates, the anxiety/depression dimension showed the weakest association with HGS in comparison with other dimensions. Other studies have shown similar results suggesting that HGS was positively correlated with global, physical, and environmental domains but not with the psychological domain in quality of life.<sup>27</sup> However, opposite results have also been reported. Lene et al. observed that HGS was correlated with not only mobility and physical function but also the mental component of HRQoL.<sup>28</sup> Recently, many studies have assessed the relationship between HGS and depression in the general population or elderly.<sup>18 29</sup> Most have shown a positive correlation; in particular, a longitudinal study with a six-year follow-up period reported that weak HGS increased the risk of depression.<sup>29</sup> In recent years, cytokines such as brain-derived neurotrophic factor (BDNF) and several interleukins (IL-6, IL-7, IL-15) have been reported to be secreted by skeletal muscle and act on the brain, ultimately affecting cognitive function.<sup>30</sup>

<sup>31</sup> One study suggested that low BDNF levels were associated with cognitive impairment and that high IL-6 levels were strongly associated with depression in cancer patients.<sup>32</sup> HGS was also strongly correlated with the anxiety/depression domain only for elderly over 70 years of age in the age-based analysis in the present study. Taking the above into consideration, the time

1  
2  
3 factor may need to be considered to confirm the association between HGS and  
4  
5 anxiety/depression domain. Therefore, longitudinal studies are necessary.  
6

7  
8 This study has significant strength of using a nationally representative and well-designed  
9  
10 systematic data. This study identified that weak HGS is associated with impaired HRQoL in  
11  
12 cancer survivors. Previous studies have investigated the relationships in the general population  
13  
14 or in other disease settings<sup>16 27 28 33</sup> or have assessed other endpoints such as cognitive  
15  
16 dysfunction.<sup>34</sup> As the number of cancer survivors has rapidly increased and monitoring and  
17  
18 managing the quality of life of cancer survivors has become important, the results of this study  
19  
20 are noteworthy. The results of this study suggest the possibility of weak HGS as a tool to predict  
21  
22 poor HRQoL in cancer survivors. In addition, the measurement of HGS is easy, fast,  
23  
24 inexpensive, reproducible, and reliable enough to be used in clinical practice to monitor patient  
25  
26 quality of life.  
27  
28

29  
30 A major limitation of this study was its cross-sectional designs, which makes it difficult to  
31  
32 assess causality between HGS and quality of life. It is possible that poor physical function  
33  
34 represented by weak HGS may have been the direct cause of poor quality of life. Conversely,  
35  
36 cancer survivors with better HRQoL may be more independent, so that the physical function is  
37  
38 well maintained. Of course, both may behave in a bidirectional way. Second, there may be a  
39  
40 selection bias, even if this survey was well-designed to include a sample representing the  
41  
42 Korean population. Subjects who died early or cancer survivors living in nursing homes or  
43  
44 long-term care facilities may not have been included in this study. In addition, there was a  
45  
46 possibility of underreporting because it was a self-reporting system about the history of cancer.  
47  
48 Third, we did not collect detailed medical information related to cancer such as cancer stage,  
49  
50 types of cancer treatments, and family history of cancer. Fourth, since our data were confined  
51  
52 to the Korean population, the results cannot be generalized to other ethnic populations. Finally,  
53  
54 there was a disadvantage that the cut-off value of the HGS used in this study was arbitrarily  
55  
56  
57  
58  
59  
60

1  
2  
3 determined. We classified the normal HGS group and the weak HGS group as the lowest  
4  
5 quintiles (29.7 kg for men and 19.7 kg for women). These values were similar to the cut-off  
6  
7 values for low muscle strength of 30 kg for men and 20 kg for women for diagnosing sarcopenia  
8  
9 defined by European Working Group on Sarcopenia in Older People (EWGSOP).<sup>35</sup> Although  
10  
11 the recently updated guideline recommended the low cut-off value for low muscle strength of  
12  
13 27 kg for men and 16 kg for women by the European Working Group on Sarcopenia in Older  
14  
15 People 2 (EWGSOP2)<sup>36</sup>, we could not analyze data according to these values since the number  
16  
17 of cases under 27 kg for men and 16 kg for women was extremely small.  
18  
19  
20  
21  
22

## 23 24 **Conclusion**

25  
26 Our results from a population-based sample show that weak HGS is significantly associated  
27  
28 with impaired HRQoL in cancer survivors. HGS can be used as a predictor of quality of life in  
29  
30 cancer survivors as it is easy, inexpensive, and reliable. The anxiety/depression dimension had  
31  
32 a relatively weak correlation with HGS compared with those of mobility, self-care, usual  
33  
34 activity, and pain/discomfort. Future prospective studies on the management of weak HGS in  
35  
36 cancer survivors will increase understanding of the causal relationships and determine the  
37  
38 clinical implications.  
39  
40  
41  
42  
43  
44  
45  
46  
47  
48

## 49 **ACKNOWLEDGMENTS**

50  
51 The authors thank the KCDC, who performed the KNHANES.  
52  
53  
54  
55  
56

## 57 **AUTHOR DISCLOSURES**

58  
59  
60

### **Funding statement**

This research did not receive any specific grants from funding agencies in the public, commercial, or not-for-profit sectors.

### **Competing interests statement**

There are no known conflicts of interest associated with this publication.

### **Data sharing statement:**

The data are available in a public, open access repository. Currently, anyone can access the website.

### **AUTHOR CONTRIBUTIONS**

YJC: conceived the study question and contributed to the study design, supervision of data collection, data analysis and interpretation, and writing of the manuscript.

JKP: contributed to the study design and undertook data collection, analysis, and interpretation and writing of the manuscript.

## REFERENCES

1. Siegel RL, Miller KD, Jemal A. Cancer statistics, 2018. *CA Cancer J Clin* 2018;68(1):7-30. doi: 10.3322/caac.21442 [published Online First: 2018/01/10]
2. Jung KW, Won YJ, Kong HJ, et al. Cancer Statistics in Korea: Incidence, Mortality, Survival, and Prevalence in 2016. *Cancer Res Treat* 2019 doi: 10.4143/crt.2019.138 [published Online First: 2019/03/28]
3. Mayer DK, Nasso SF, Earp JA. Defining cancer survivors, their needs, and perspectives on survivorship health care in the USA. *The Lancet Oncology* 2017;18(1):e11-e18. doi: 10.1016/s1470-2045(16)30573-3
4. Rowland JH, Yancik R. Cancer survivorship: the interface of aging, comorbidity, and quality care. *J Natl Cancer Inst* 2006;98(8):504-5. doi: 10.1093/jnci/djj154 [published Online First: 2006/04/20]
5. Lustberg MB, Reinbolt RE, Shapiro CL. Bone health in adult cancer survivorship. *J Clin Oncol* 2012;30(30):3665-74. doi: 10.1200/JCO.2012.42.2097 [published Online First: 2012/09/26]
6. Kenzik KM, Morey MC, Cohen HJ, et al. Symptoms, weight loss, and physical function in a lifestyle intervention study of older cancer survivors. *J Geriatr Oncol* 2015;6(6):424-32. doi: 10.1016/j.jgo.2015.08.004 [published Online First: 2015/09/13]
7. Stein KD, Syrjala KL, Andrykowski MA. Physical and psychological long-term and late effects of cancer. *Cancer* 2008;112(11 Suppl):2577-92. doi: 10.1002/cncr.23448 [published Online First: 2008/04/23]
8. Annunziata MA, Muzzatti B, Flaiban C, et al. Long-term quality of life profile in oncology: a comparison between cancer survivors and the general population. *Support Care Cancer* 2018;26(2):651-56. doi: 10.1007/s00520-017-3880-8 [published Online First: 2017/09/18]
9. Annunziata MA, Muzzatti B, Giovannini L, et al. Is long-term cancer survivors' quality of life comparable to that of the general population? An Italian study. *Support Care Cancer* 2015;23(9):2663-8. doi: 10.1007/s00520-015-2628-6 [published Online First: 2015/02/04]
10. Oh MG, Han MA, Park CY, et al. Health-related quality of life among cancer survivors in Korea: the Korea National Health and Nutrition Examination Survey. *Jpn J Clin Oncol* 2014;44(2):153-8. doi: 10.1093/jjco/hyt187 [published Online First: 2013/12/04]
11. Gunther CM, Burger A, Rickert M, et al. Grip strength in healthy caucasian adults: reference values. *J Hand Surg Am* 2008;33(4):558-65. doi: 10.1016/j.jhssa.2008.01.008 [published Online First: 2008/04/15]
12. Bohannon RW. Test-Retest Reliability of Measurements of Hand-Grip Strength Obtained by Dynamometry from Older Adults: A Systematic Review of Research in the PubMed Database.



- 1  
2  
3  
4  
5  
6  
7  
8  
9  
10  
11  
12  
13  
14  
15  
16  
17  
18  
19  
20  
21  
22  
23  
24  
25  
26  
27  
28  
29  
30  
31  
32  
33  
34  
35  
36  
37  
38  
39  
40  
41  
42  
43  
44  
45  
46  
47  
48  
49  
50  
51  
52  
53  
54  
55  
56  
57  
58  
59  
60
- J Frailty Aging* 2017;6(2):83-87. doi: 10.14283/jfa.2017.8 [published Online First: 2017/05/31]
13. Bohannon RW. Hand-grip dynamometry predicts future outcomes in aging adults. *J Geriatr Phys Ther* 2008;31(1):3-10. [published Online First: 2008/05/21]
14. Bohannon RW. Muscle strength: clinical and prognostic value of hand-grip dynamometry. *Curr Opin Clin Nutr Metab Care* 2015;18(5):465-70. doi: 10.1097/MCO.0000000000000202 [published Online First: 2015/07/07]
15. Cheung CL, Nguyen US, Au E, et al. Association of handgrip strength with chronic diseases and multimorbidity: a cross-sectional study. *Age (Dordr)* 2013;35(3):929-41. doi: 10.1007/s11357-012-9385-y [published Online First: 2012/02/09]
16. Rashed AM, Abdel-Wahab N, Moussa EMM, et al. Association of hand grip strength with disease activity, disability and quality of life in children and adolescents with Juvenile Idiopathic Arthritis. *Adv Rheumatol* 2018;58(1):11. doi: 10.1186/s42358-018-0012-1 [published Online First: 2019/01/19]
17. Nishikawa H, Enomoto H, Yoh K, et al. Health-Related Quality of Life in Chronic Liver Diseases: A Strong Impact of Hand Grip Strength. *J Clin Med* 2018;7(12) doi: 10.3390/jcm7120553 [published Online First: 2018/12/19]
18. Lee MR, Jung SM, Bang H, et al. The association between muscular strength and depression in Korean adults: a cross-sectional analysis of the sixth Korea National Health and Nutrition Examination Survey (KNHANES VI) 2014. *BMC Public Health* 2018;18(1):1123. doi: 10.1186/s12889-018-6030-4 [published Online First: 2018/09/17]
19. Kim CR, Jeon YJ, Kim MC, et al. Reference values for hand grip strength in the South Korean population. *PLoS One* 2018;13(4):e0195485. doi: 10.1371/journal.pone.0195485 [published Online First: 2018/04/07]
20. Yoo JI, Choi H, Ha YC. Mean Hand Grip Strength and Cut-off Value for Sarcopenia in Korean Adults Using KNHANES VI. *J Korean Med Sci* 2017;32(5):868-72. doi: 10.3346/jkms.2017.32.5.868 [published Online First: 2017/04/06]
21. Morishita S, Tsubaki A, Fu JB, et al. Cancer survivors exhibit a different relationship between muscle strength and health-related quality of life/fatigue compared to healthy subjects. *Eur J Cancer Care (Engl)* 2018;27(4):e12856. doi: 10.1111/ecc.12856 [published Online First: 2018/05/17]
22. Glaser AW, Fraser LK, Corner J, et al. Patient-reported outcomes of cancer survivors in England 1-5 years after diagnosis: a cross-sectional survey. *BMJ Open* 2013;3(4) doi: 10.1136/bmjopen-2012-002317 [published Online First: 2013/04/13]
23. Sanchez-Jimenez A, Cantarero-Villanueva I, Delgado-Garcia G, et al. Physical impairments and quality of life of colorectal cancer survivors: a case-control study. *Eur J Cancer Care (Engl)* 2015;24(5):642-9. doi: 10.1111/ecc.12218 [published Online First: 2014/07/25]
24. Claridy MD, Ansa B, Damus F, et al. Health-related quality of life of African-American female breast cancer survivors, survivors of other cancers, and those without cancer. *Qual Life Res* 2018;27(8):2067-75. doi: 10.1007/s11136-018-1862-z [published Online First: 2018/04/29]

- 1  
2  
3  
4 25. Henriksen M, Rosager S, Aaboe J, et al. Experimental knee pain reduces muscle strength. *J Pain*  
5 2011;12(4):460-7. doi: 10.1016/j.jpain.2010.10.004 [published Online First: 2010/12/15]  
6  
7 26. Baert IAC, Meeus M, Mahmoudian A, et al. Do Psychosocial Factors Predict Muscle Strength,  
8 Pain, or Physical Performance in Patients With Knee Osteoarthritis? *J Clin Rheumatol*  
9 2017;23(6):308-16. doi: 10.1097/RHU.0000000000000560 [published Online First: 2017/08/18]  
10  
11 27. Musalek C, Kirchengast S. Grip Strength as an Indicator of Health-Related Quality of Life in Old  
12 Age-A Pilot Study. *Int J Environ Res Public Health* 2017;14(12) doi: 10.3390/ijerph14121447  
13 [published Online First: 2017/12/01]  
14  
15 28. Jakobsen LH, Rask IK, Kondrup J. Validation of handgrip strength and endurance as a measure  
16 of physical function and quality of life in healthy subjects and patients. *Nutrition*  
17 2010;26(5):542-50. doi: 10.1016/j.nut.2009.06.015 [published Online First: 2009/10/07]  
18  
19 29. Fukumori N, Yamamoto Y, Takegami M, et al. Association between hand-grip strength and  
20 depressive symptoms: Locomotive Syndrome and Health Outcomes in Aizu Cohort Study  
21 (LOHAS). *Age Ageing* 2015;44(4):592-8. doi: 10.1093/ageing/afv013 [published Online First:  
22 2015/02/26]  
23  
24 30. Pedersen BK. Muscle as a secretory organ. *Compr Physiol* 2013;3(3):1337-62. doi:  
25 10.1002/cphy.c120033 [published Online First: 2013/07/31]  
26  
27 31. Ng T, Teo SM, Yeo HL, et al. Brain-derived neurotrophic factor genetic polymorphism (rs6265) is  
28 protective against chemotherapy-associated cognitive impairment in patients with early-  
29 stage breast cancer. *Neuro Oncol* 2016;18(2):244-51. doi: 10.1093/neuonc/nov162 [published  
30 Online First: 2015/08/21]  
31  
32 32. Jehn CF, Becker B, Flath B, et al. Neurocognitive function, brain-derived neurotrophic factor  
33 (BDNF) and IL-6 levels in cancer patients with depression. *J Neuroimmunol* 2015;287:88-92.  
34 doi: 10.1016/j.jneuroim.2015.08.012 [published Online First: 2015/10/07]  
35  
36 33. Kilgour RD, Vigano A, Trutschnigg B, et al. Handgrip strength predicts survival and is associated  
37 with markers of clinical and functional outcomes in advanced cancer patients. *Support Care*  
38 *Cancer* 2013;21(12):3261-70. doi: 10.1007/s00520-013-1894-4  
39  
40 34. Yang L, Koyanagi A, Smith L, et al. Hand grip strength and cognitive function among elderly  
41 cancer survivors. *PLoS One* 2018;13(6):e0197909. doi: 10.1371/journal.pone.0197909  
42 [published Online First: 2018/06/05]  
43  
44 35. Cruz-Jentoft AJ, Baeyens JP, Bauer JM, et al. Sarcopenia: European consensus on definition and  
45 diagnosis: Report of the European Working Group on Sarcopenia in Older People. *Age*  
46 *Ageing* 2010;39(4):412-23. doi: 10.1093/ageing/afq034 [published Online First: 2010/04/16]  
47  
48 36. Cruz-Jentoft AJ, Bahat G, Bauer J, et al. Sarcopenia: revised European consensus on definition  
49 and diagnosis. *Age Ageing* 2019;48(1):16-31. doi: 10.1093/ageing/afy169 [published Online  
50 First: 2018/10/13]  
51  
52  
53  
54  
55  
56  
57  
58  
59  
60

## FIGURE LEGENDS

**Figure 1. Flow diagram of participant selection (KNHANES VI-VII, Korea National Health and Nutrition Examination Survey VI-VII).**

**Figure 2. Radar chart plot of the percentages of participants with impaired of health-related quality of life according to age group in cancer survivors (compared with general population).** An asterisk indicates a significantly (p-value <0.05) larger percentage of impairment in health-related quality of life (some or extreme problems in EQ-5D dimensions) in the weak hand strength group compared with that in the normal group. MO: mobility; SC: self-care, UA: usual activity; PD: pain/discomfort; AD: anxiety/depression; HGS: hand grip strength.

**Figure 3. Comparisons of hand grip strengths according to three levels of health-related quality of life for each dimension.** The trend of hand grip strength according to the severity of dimension was assessed using Jonckheere-Terpstra tests. EQ-5D: EuroQol-5 dimension

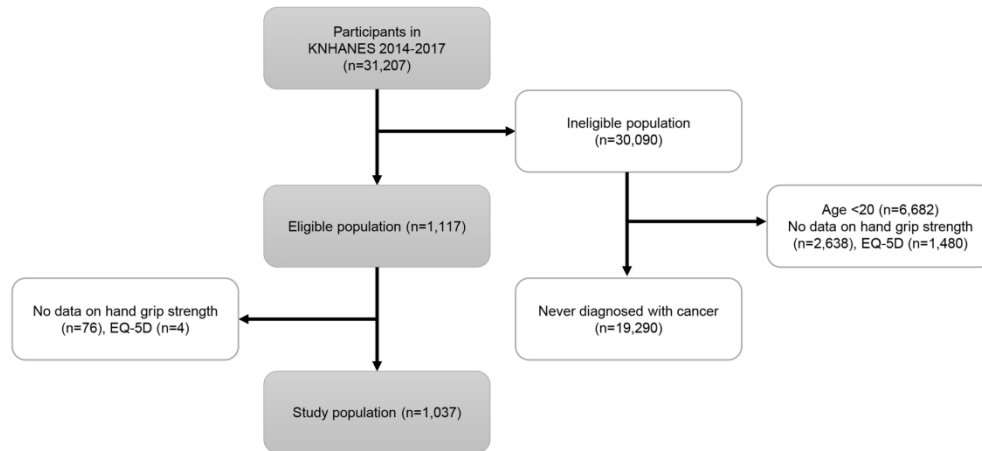

Figure 1. Flow diagram of participant selection (KNHANES VI-VII, Korea National Health and Nutrition Examination Survey VI-VII).

90x90mm (600 x 600 DPI)

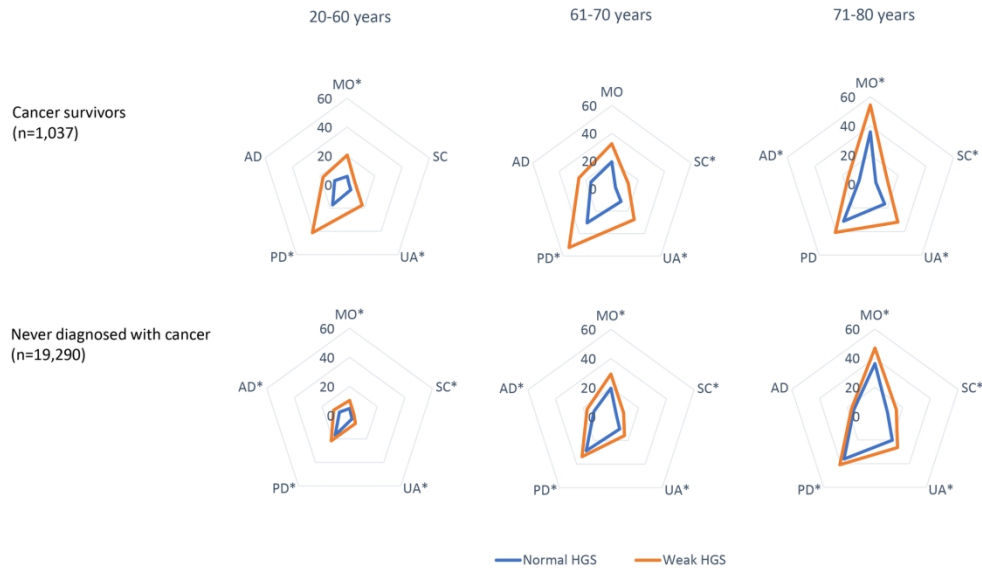

Figure 2. Radar chart plot of the percentages of participants with impaired of health-related quality of life according to age group in cancer survivors (compared with general population). An asterisk indicates a significantly (p-value <0.05) larger percentage of impairment in health-related quality of life (some or extreme problems in EQ-5D dimensions) in the weak hand strength group compared with that in the normal group. MO: mobility; SC: self-care, UA: usual activity; PD: pain/discomfort; AD: anxiety/depression; HGS: hand grip strength.

90x90mm (600 x 600 DPI)

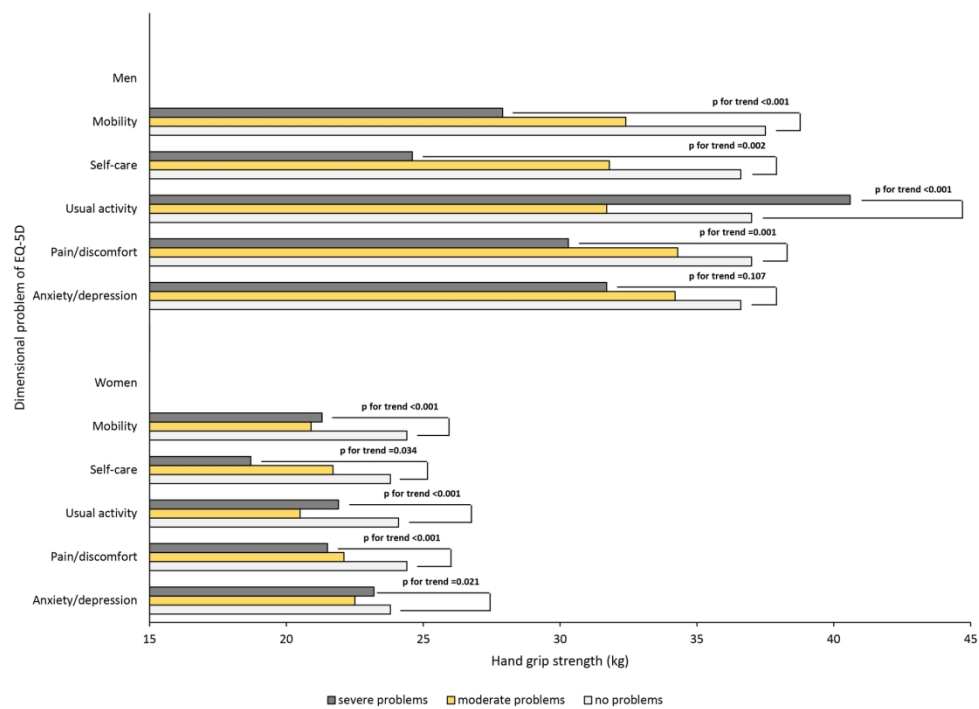

Figure 3. Comparisons of hand grip strengths according to three levels of health-related quality of life for each dimension. The trend of hand grip strength according to the severity of dimension was assessed using Jonckheere-Terpstra tests. EQ-5D: EuroQol-5 dimension

90x90mm (600 x 600 DPI)

# Reporting checklist for cross sectional study.

Based on the STROBE cross sectional guidelines.

## Instructions to authors

Complete this checklist by entering the page numbers from your manuscript where readers will find each of the items listed below.

Your article may not currently address all the items on the checklist. Please modify your text to include the missing information. If you are certain that an item does not apply, please write "n/a" and provide a short explanation.

Upload your completed checklist as an extra file when you submit to a journal.

In your methods section, say that you used the STROBE cross sectional reporting guidelines, and cite them as:

von Elm E, Altman DG, Egger M, Pocock SJ, Gotsche PC, Vandenbroucke JP. The Strengthening the Reporting of Observational Studies in Epidemiology (STROBE) Statement: guidelines for reporting observational studies.

|          |     | Reporting Item                                                                                  | Page Number |
|----------|-----|-------------------------------------------------------------------------------------------------|-------------|
| Title    | #1a | Indicate the study's design with a commonly used term in the title or the abstract              | 1           |
| Abstract | #1b | Provide in the abstract an informative and balanced summary of what was done and what was found | 3           |

|    |                      |     |                                                                 |     |
|----|----------------------|-----|-----------------------------------------------------------------|-----|
| 1  | Background /         | #2  | Explain the scientific background and rationale for the         | 6   |
| 2  |                      |     |                                                                 |     |
| 3  | rationale            |     | investigation being reported                                    |     |
| 4  |                      |     |                                                                 |     |
| 5  |                      |     |                                                                 |     |
| 6  | Objectives           | #3  | State specific objectives, including any prespecified           | 7   |
| 7  |                      |     |                                                                 |     |
| 8  |                      |     | hypotheses                                                      |     |
| 9  |                      |     |                                                                 |     |
| 10 |                      |     |                                                                 |     |
| 11 | Study design         | #4  | Present key elements of study design early in the paper         | 7   |
| 12 |                      |     |                                                                 |     |
| 13 |                      |     |                                                                 |     |
| 14 |                      |     |                                                                 |     |
| 15 | Setting              | #5  | Describe the setting, locations, and relevant dates, including  | 7   |
| 16 |                      |     |                                                                 |     |
| 17 |                      |     | periods of recruitment, exposure, follow-up, and data           |     |
| 18 |                      |     |                                                                 |     |
| 19 |                      |     | collection                                                      |     |
| 20 |                      |     |                                                                 |     |
| 21 |                      |     |                                                                 |     |
| 22 | Eligibility criteria | #6a | Give the eligibility criteria, and the sources and methods of   | 7   |
| 23 |                      |     |                                                                 |     |
| 24 |                      |     | selection of participants.                                      |     |
| 25 |                      |     |                                                                 |     |
| 26 |                      |     |                                                                 |     |
| 27 |                      |     |                                                                 |     |
| 28 |                      | #7  | Clearly define all outcomes, exposures, predictors, potential   | 7   |
| 29 |                      |     |                                                                 |     |
| 30 |                      |     | confounders, and effect modifiers. Give diagnostic criteria, if |     |
| 31 |                      |     |                                                                 |     |
| 32 |                      |     | applicable                                                      |     |
| 33 |                      |     |                                                                 |     |
| 34 |                      |     |                                                                 |     |
| 35 | Data sources /       | #8  | For each variable of interest give sources of data and details  | 7-8 |
| 36 |                      |     |                                                                 |     |
| 37 | measurement          |     | of methods of assessment (measurement). Describe                |     |
| 38 |                      |     |                                                                 |     |
| 39 |                      |     | comparability of assessment methods if there is more than       |     |
| 40 |                      |     |                                                                 |     |
| 41 |                      |     | one group. Give information separately for for exposed and      |     |
| 42 |                      |     |                                                                 |     |
| 43 |                      |     | unexposed groups if applicable.                                 |     |
| 44 |                      |     |                                                                 |     |
| 45 |                      |     |                                                                 |     |
| 46 |                      |     |                                                                 |     |
| 47 | Bias                 | #9  | Describe any efforts to address potential sources of bias       | 8-9 |
| 48 |                      |     |                                                                 |     |
| 49 |                      |     |                                                                 |     |
| 50 |                      |     |                                                                 |     |
| 51 | Study size           | #10 | Explain how the study size was arrived at                       | 7   |
| 52 |                      |     |                                                                 |     |
| 53 |                      |     |                                                                 |     |
| 54 |                      |     |                                                                 |     |
| 55 |                      |     |                                                                 |     |
| 56 |                      |     |                                                                 |     |
| 57 |                      |     |                                                                 |     |
| 58 |                      |     |                                                                 |     |
| 59 |                      |     |                                                                 |     |
| 60 |                      |     |                                                                 |     |



|    |                        |                                                  |                                                                                                                                                                                                                   |                                                                                   |                                                                                                                                                                                                                                                                                |
|----|------------------------|--------------------------------------------------|-------------------------------------------------------------------------------------------------------------------------------------------------------------------------------------------------------------------|-----------------------------------------------------------------------------------|--------------------------------------------------------------------------------------------------------------------------------------------------------------------------------------------------------------------------------------------------------------------------------|
| 1  | Quantitative variables | #11                                              | Explain how quantitative variables were handled in the analyses. If applicable, describe which groupings were chosen, and why                                                                                     | 8-9                                                                               |                                                                                                                                                                                                                                                                                |
| 2  |                        | Statistical methods                              | #12a                                                                                                                                                                                                              | Describe all statistical methods, including those used to control for confounding | 8-9                                                                                                                                                                                                                                                                            |
| 3  |                        |                                                  | #12b                                                                                                                                                                                                              | Describe any methods used to examine subgroups and interactions                   | 8-9                                                                                                                                                                                                                                                                            |
| 4  |                        |                                                  | #12c                                                                                                                                                                                                              | Explain how missing data were addressed                                           | 8-9                                                                                                                                                                                                                                                                            |
| 5  |                        |                                                  | #12d                                                                                                                                                                                                              | If applicable, describe analytical methods taking account of sampling strategy    | 8-9                                                                                                                                                                                                                                                                            |
| 6  |                        |                                                  | #12e                                                                                                                                                                                                              | Describe any sensitivity analyses                                                 | 8-9                                                                                                                                                                                                                                                                            |
| 7  |                        |                                                  | Participants                                                                                                                                                                                                      | #13a                                                                              | Report numbers of individuals at each stage of study—eg numbers potentially eligible, examined for eligibility, confirmed eligible, included in the study, completing follow-up, and analysed. Give information separately for for exposed and unexposed groups if applicable. |
| 8  | #13b                   | Give reasons for non-participation at each stage |                                                                                                                                                                                                                   | 7                                                                                 |                                                                                                                                                                                                                                                                                |
| 9  | #13c                   | Consider use of a flow diagram                   |                                                                                                                                                                                                                   | 7                                                                                 |                                                                                                                                                                                                                                                                                |
| 10 | Descriptive data       | #14a                                             | Give characteristics of study participants (eg demographic, clinical, social) and information on exposures and potential confounders. Give information separately for exposed and unexposed groups if applicable. | 9                                                                                 |                                                                                                                                                                                                                                                                                |
| 11 |                        |                                                  |                                                                                                                                                                                                                   |                                                                                   |                                                                                                                                                                                                                                                                                |
| 12 |                        |                                                  |                                                                                                                                                                                                                   |                                                                                   |                                                                                                                                                                                                                                                                                |
| 13 |                        |                                                  |                                                                                                                                                                                                                   |                                                                                   |                                                                                                                                                                                                                                                                                |
| 14 |                        |                                                  |                                                                                                                                                                                                                   |                                                                                   |                                                                                                                                                                                                                                                                                |
| 15 |                        |                                                  |                                                                                                                                                                                                                   |                                                                                   |                                                                                                                                                                                                                                                                                |
| 16 |                        |                                                  |                                                                                                                                                                                                                   |                                                                                   |                                                                                                                                                                                                                                                                                |
| 17 |                        |                                                  |                                                                                                                                                                                                                   |                                                                                   |                                                                                                                                                                                                                                                                                |
| 18 |                        |                                                  |                                                                                                                                                                                                                   |                                                                                   |                                                                                                                                                                                                                                                                                |
| 19 |                        |                                                  |                                                                                                                                                                                                                   |                                                                                   |                                                                                                                                                                                                                                                                                |
| 20 |                        |                                                  |                                                                                                                                                                                                                   |                                                                                   |                                                                                                                                                                                                                                                                                |
| 21 |                        |                                                  |                                                                                                                                                                                                                   |                                                                                   |                                                                                                                                                                                                                                                                                |
| 22 |                        |                                                  |                                                                                                                                                                                                                   |                                                                                   |                                                                                                                                                                                                                                                                                |
| 23 |                        |                                                  |                                                                                                                                                                                                                   |                                                                                   |                                                                                                                                                                                                                                                                                |
| 24 |                        |                                                  |                                                                                                                                                                                                                   |                                                                                   |                                                                                                                                                                                                                                                                                |
| 25 |                        |                                                  |                                                                                                                                                                                                                   |                                                                                   |                                                                                                                                                                                                                                                                                |
| 26 |                        |                                                  |                                                                                                                                                                                                                   |                                                                                   |                                                                                                                                                                                                                                                                                |
| 27 |                        |                                                  |                                                                                                                                                                                                                   |                                                                                   |                                                                                                                                                                                                                                                                                |
| 28 |                        |                                                  |                                                                                                                                                                                                                   |                                                                                   |                                                                                                                                                                                                                                                                                |
| 29 |                        |                                                  |                                                                                                                                                                                                                   |                                                                                   |                                                                                                                                                                                                                                                                                |
| 30 |                        |                                                  |                                                                                                                                                                                                                   |                                                                                   |                                                                                                                                                                                                                                                                                |
| 31 |                        |                                                  |                                                                                                                                                                                                                   |                                                                                   |                                                                                                                                                                                                                                                                                |
| 32 |                        |                                                  |                                                                                                                                                                                                                   |                                                                                   |                                                                                                                                                                                                                                                                                |
| 33 |                        |                                                  |                                                                                                                                                                                                                   |                                                                                   |                                                                                                                                                                                                                                                                                |
| 34 |                        |                                                  |                                                                                                                                                                                                                   |                                                                                   |                                                                                                                                                                                                                                                                                |
| 35 |                        |                                                  |                                                                                                                                                                                                                   |                                                                                   |                                                                                                                                                                                                                                                                                |
| 36 |                        |                                                  |                                                                                                                                                                                                                   |                                                                                   |                                                                                                                                                                                                                                                                                |
| 37 |                        |                                                  |                                                                                                                                                                                                                   |                                                                                   |                                                                                                                                                                                                                                                                                |
| 38 |                        |                                                  |                                                                                                                                                                                                                   |                                                                                   |                                                                                                                                                                                                                                                                                |
| 39 |                        |                                                  |                                                                                                                                                                                                                   |                                                                                   |                                                                                                                                                                                                                                                                                |
| 40 |                        |                                                  |                                                                                                                                                                                                                   |                                                                                   |                                                                                                                                                                                                                                                                                |
| 41 |                        |                                                  |                                                                                                                                                                                                                   |                                                                                   |                                                                                                                                                                                                                                                                                |
| 42 |                        |                                                  |                                                                                                                                                                                                                   |                                                                                   |                                                                                                                                                                                                                                                                                |
| 43 |                        |                                                  |                                                                                                                                                                                                                   |                                                                                   |                                                                                                                                                                                                                                                                                |
| 44 |                        |                                                  |                                                                                                                                                                                                                   |                                                                                   |                                                                                                                                                                                                                                                                                |
| 45 |                        |                                                  |                                                                                                                                                                                                                   |                                                                                   |                                                                                                                                                                                                                                                                                |
| 46 |                        |                                                  |                                                                                                                                                                                                                   |                                                                                   |                                                                                                                                                                                                                                                                                |
| 47 |                        |                                                  |                                                                                                                                                                                                                   |                                                                                   |                                                                                                                                                                                                                                                                                |
| 48 |                        |                                                  |                                                                                                                                                                                                                   |                                                                                   |                                                                                                                                                                                                                                                                                |
| 49 |                        |                                                  |                                                                                                                                                                                                                   |                                                                                   |                                                                                                                                                                                                                                                                                |
| 50 |                        |                                                  |                                                                                                                                                                                                                   |                                                                                   |                                                                                                                                                                                                                                                                                |
| 51 |                        |                                                  |                                                                                                                                                                                                                   |                                                                                   |                                                                                                                                                                                                                                                                                |
| 52 |                        |                                                  |                                                                                                                                                                                                                   |                                                                                   |                                                                                                                                                                                                                                                                                |
| 53 |                        |                                                  |                                                                                                                                                                                                                   |                                                                                   |                                                                                                                                                                                                                                                                                |
| 54 |                        |                                                  |                                                                                                                                                                                                                   |                                                                                   |                                                                                                                                                                                                                                                                                |
| 55 |                        |                                                  |                                                                                                                                                                                                                   |                                                                                   |                                                                                                                                                                                                                                                                                |
| 56 |                        |                                                  |                                                                                                                                                                                                                   |                                                                                   |                                                                                                                                                                                                                                                                                |
| 57 |                        |                                                  |                                                                                                                                                                                                                   |                                                                                   |                                                                                                                                                                                                                                                                                |
| 58 |                        |                                                  |                                                                                                                                                                                                                   |                                                                                   |                                                                                                                                                                                                                                                                                |
| 59 |                        |                                                  |                                                                                                                                                                                                                   |                                                                                   |                                                                                                                                                                                                                                                                                |
| 60 |                        |                                                  |                                                                                                                                                                                                                   |                                                                                   |                                                                                                                                                                                                                                                                                |

|    |                |      |                                                                   |       |
|----|----------------|------|-------------------------------------------------------------------|-------|
| 1  |                | #14b | Indicate number of participants with missing data for each        | 7     |
| 2  |                |      |                                                                   |       |
| 3  |                |      | variable of interest                                              |       |
| 4  |                |      |                                                                   |       |
| 5  |                |      |                                                                   |       |
| 6  | Outcome data   | #15  | Report numbers of outcome events or summary measures.             | 9-12  |
| 7  |                |      |                                                                   |       |
| 8  |                |      | Give information separately for exposed and unexposed             |       |
| 9  |                |      | groups if applicable.                                             |       |
| 10 |                |      |                                                                   |       |
| 11 |                |      |                                                                   |       |
| 12 |                |      |                                                                   |       |
| 13 |                |      |                                                                   |       |
| 14 | Main results   | #16a | Give unadjusted estimates and, if applicable, confounder-         | 13-15 |
| 15 |                |      |                                                                   |       |
| 16 |                |      | adjusted estimates and their precision (eg, 95% confidence        |       |
| 17 |                |      | interval). Make clear which confounders were adjusted for         |       |
| 18 |                |      | and why they were included                                        |       |
| 19 |                |      |                                                                   |       |
| 20 |                |      |                                                                   |       |
| 21 |                |      |                                                                   |       |
| 22 |                |      |                                                                   |       |
| 23 |                |      |                                                                   |       |
| 24 |                | #16b | Report category boundaries when continuous variables were         | 13-14 |
| 25 |                |      | categorized                                                       |       |
| 26 |                |      |                                                                   |       |
| 27 |                |      |                                                                   |       |
| 28 |                |      |                                                                   |       |
| 29 |                |      |                                                                   |       |
| 30 |                | #16c | If relevant, consider translating estimates of relative risk into | 14-15 |
| 31 |                |      | absolute risk for a meaningful time period                        |       |
| 32 |                |      |                                                                   |       |
| 33 |                |      |                                                                   |       |
| 34 |                |      |                                                                   |       |
| 35 | Other analyses | #17  | Report other analyses done—e.g., analyses of subgroups            | 13-14 |
| 36 |                |      |                                                                   |       |
| 37 |                |      | and interactions, and sensitivity analyses                        |       |
| 38 |                |      |                                                                   |       |
| 39 |                |      |                                                                   |       |
| 40 | Key results    | #18  | Summarise key results with reference to study objectives          | 15    |
| 41 |                |      |                                                                   |       |
| 42 |                |      |                                                                   |       |
| 43 | Limitations    | #19  | Discuss limitations of the study, taking into account sources     | 17-18 |
| 44 |                |      |                                                                   |       |
| 45 |                |      | of potential bias or imprecision. Discuss both direction and      |       |
| 46 |                |      | magnitude of any potential bias.                                  |       |
| 47 |                |      |                                                                   |       |
| 48 |                |      |                                                                   |       |
| 49 |                |      |                                                                   |       |
| 50 |                |      |                                                                   |       |
| 51 | Interpretation | #20  | Give a cautious overall interpretation considering objectives,    | 15-17 |
| 52 |                |      |                                                                   |       |
| 53 |                |      | limitations, multiplicity of analyses, results from similar       |       |
| 54 |                |      | studies, and other relevant evidence.                             |       |
| 55 |                |      |                                                                   |       |
| 56 |                |      |                                                                   |       |
| 57 |                |      |                                                                   |       |
| 58 |                |      |                                                                   |       |
| 59 |                |      |                                                                   |       |
| 60 |                |      |                                                                   |       |

|    |                  |     |                                                                |       |
|----|------------------|-----|----------------------------------------------------------------|-------|
| 1  | Generalisability | #21 | Discuss the generalisability (external validity) of the study  | 17-18 |
| 2  |                  |     |                                                                |       |
| 3  |                  |     | results                                                        |       |
| 4  |                  |     |                                                                |       |
| 5  |                  |     |                                                                |       |
| 6  | Funding          | #22 | Give the source of funding and the role of the funders for the | 20    |
| 7  |                  |     | present study and, if applicable, for the original study on    |       |
| 8  |                  |     | which the present article is based                             |       |
| 9  |                  |     |                                                                |       |
| 10 |                  |     |                                                                |       |
| 11 |                  |     |                                                                |       |
| 12 |                  |     |                                                                |       |
| 13 |                  |     |                                                                |       |

14 The STROBE checklist is distributed under the terms of the Creative Commons Attribution License  
15 CC-BY. This checklist was completed on 08. April 2019 using <https://www.goodreports.org/>, a tool  
16 made by the [EQUATOR Network](#) in collaboration with [Penelope.ai](#)  
17  
18  
19  
20  
21  
22  
23  
24  
25  
26  
27  
28  
29  
30  
31  
32  
33  
34  
35  
36  
37  
38  
39  
40  
41  
42  
43  
44  
45  
46  
47  
48  
49  
50  
51  
52  
53  
54  
55  
56  
57  
58  
59  
60
